# Supplementary material
Source: PubMed Central journal article supplement (PMC5952308)

*Supporting Information for*

**Efficient conversion of primary azides to aldehydes catalyzed by active site variants of myoglobin**

Simone Giovani<sup>#</sup>, Ritesh Singh<sup>#</sup>, and Rudi Fasan<sup>\*</sup>

*Department of Chemistry, University of Rochester, 14627 Rochester, New York, USA*

*Correspondence should be addressed to R.F. (fasan@chem.rochester.edu)*

*<sup>#</sup> These authors contributed equally to this work.*

**Table of contents:**

|                                                |               |
|------------------------------------------------|---------------|
| Supplementary Figure S1-S7                     | Pages S2-S13  |
| Experimental Procedures                        | Pages S14-S16 |
| Synthetic Procedures and Characterization Data | Pages S17-S22 |
| References                                     | Page S23      |
| Spectra                                        | Pages S24-S49 |

**Figure S1.** pH dependence of Mb(H64V,V68A)-catalyzed benzyl azide (**1**) oxidation. a) Plot of catalytic turnovers (TON) for formation of benzaldehyde (**2a**) at varying pH values ranging from 6.0 to 8.0. b) Plot describing the relative distribution of benzaldehyde (**2a**), benzylamine (**2b**), and N-benzyl-benzylimine (**2c**) products for reactions carried out at the varying pH. Reaction conditions: 400  $\mu$ L-scale reaction containing 1  $\mu$ M Mb(H64V,V68A), 10 mM **1**, 10 mM Na<sub>2</sub>S<sub>2</sub>O<sub>4</sub> in phosphate buffer at the specified pH value, room temperature, 24 hours.

| pH  | TON  | %CHO | %Imine | %Amine |
|-----|------|------|--------|--------|
| 6.0 | 3360 | 36   | 0      | 0      |
| 6.5 | 5570 | 68   | 1.3    | 0.5    |
| 7.0 | 6340 | 77   | 9.2    | 4.4    |
| 7.5 | 5080 | 66   | 15     | 11     |
| 8.0 | 3650 | 52   | 8.5    | 3.8    |

a)

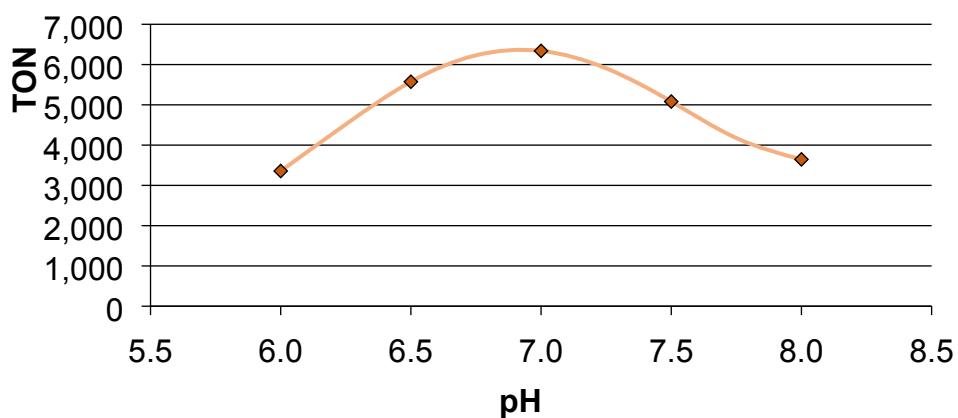

b)

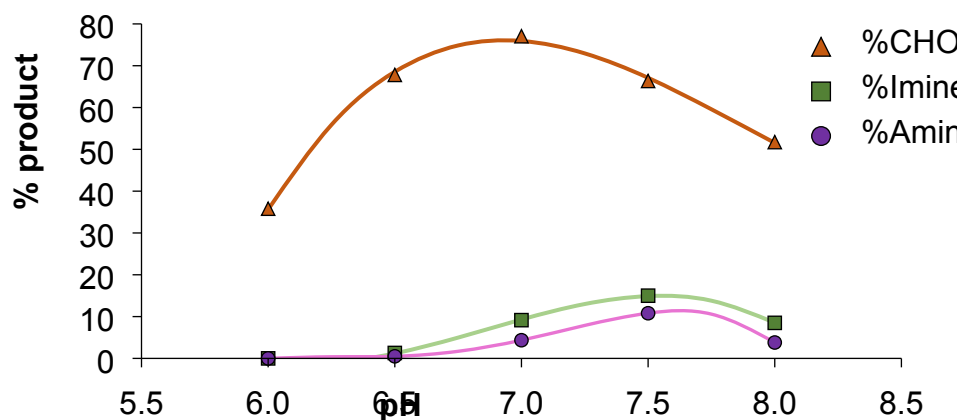

**Figure S2.** Time-dependent consumption of benzyl azide (**1**) substrate in the Mb(H64V,V68A)-catalyzed reaction as determined by gas chromatography. Reaction conditions: 1  $\mu$ M Mb(H64V,V68A), 10 mM BnN<sub>3</sub>, 10 mM Na<sub>2</sub>S<sub>2</sub>O<sub>4</sub> in KPi buffer (pH = 7.0).

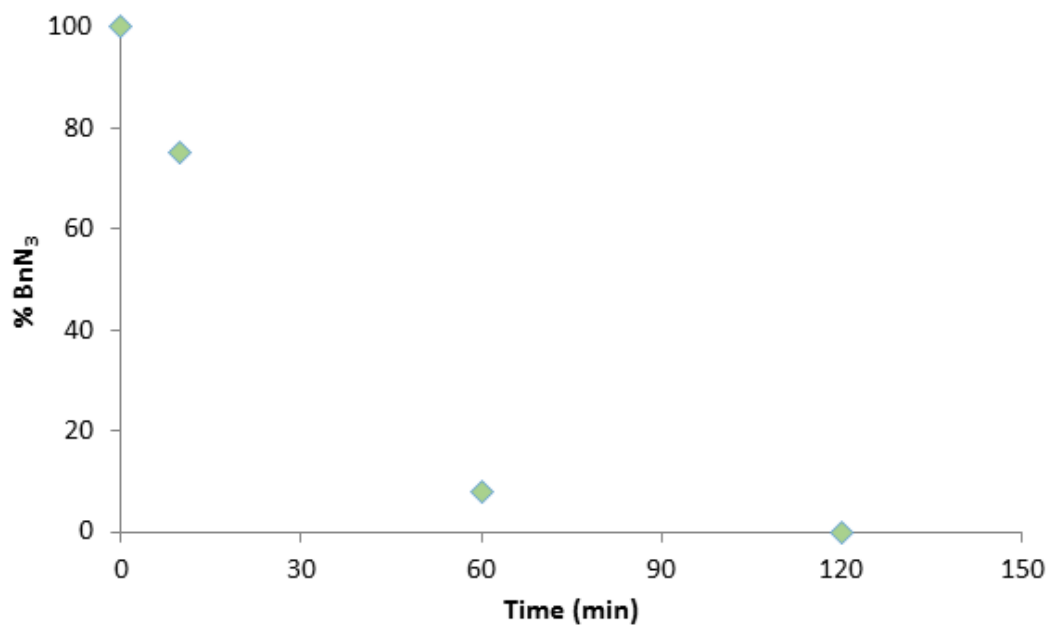

**Figure S3.** UV-vis spectra corresponding to wild-type myoglobin (WT Mb) before (dark red line) and after (light red line) addition of 20 mM benzylamine (BnNH<sub>2</sub>) and after reduction and incubation with CO (pink line). The UV-vis spectra of untreated Mb in ferric form (dark green line) and as ferrous CO-complex (light green line) are included for comparison.

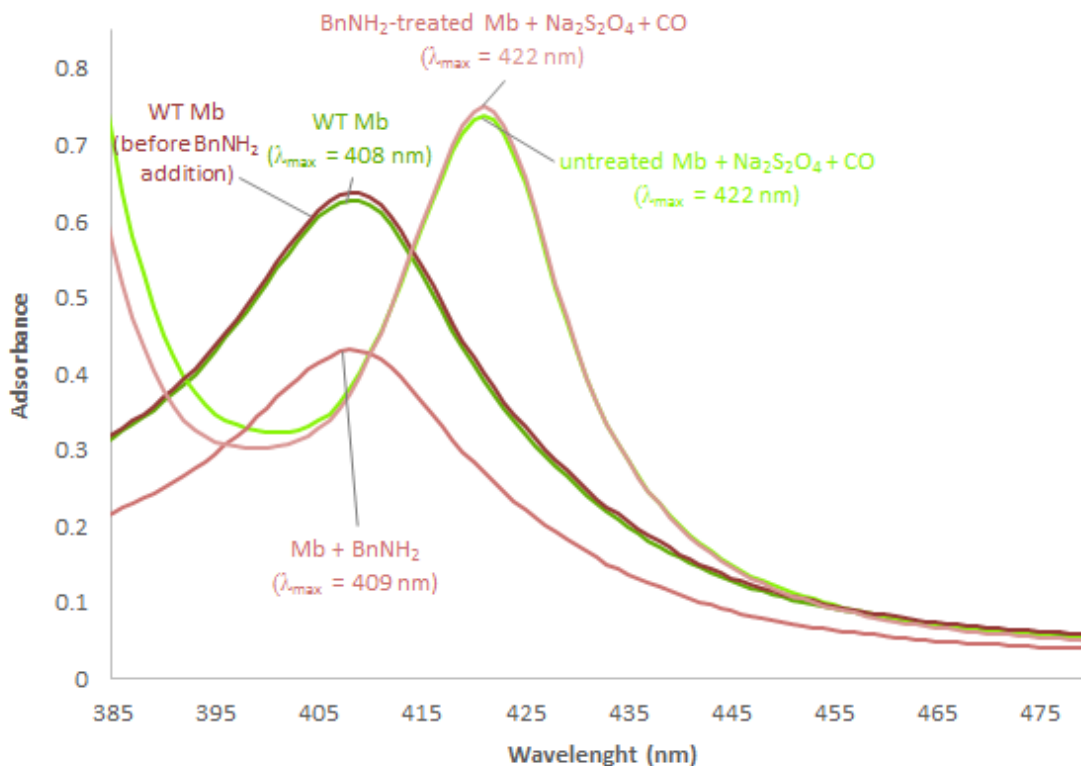

**Figure S4.** H/D competition experiments. A) GC-MS spectrum of the mixture of benzyl azide (**1**;  $m/z$  133.2) and deuterated benzyl azide (**d<sub>2</sub>-1**;  $m/z$  135.2) prior to the reaction with Mb(H64V,V68A) (**1** : **d<sub>2</sub>-1** ratio of 1 : 0.8). B) GC-MS spectrum of the benzaldehyde (**2a**) and deuterated benzaldehyde (**d-2a**) products after the reaction with Mb(H64V,V68A) and the **1** / **d<sub>2</sub>-1** mixture. The KIE value were obtained from integration of the MS signals corresponding to the molecular ions of **2a** ( $m/z$  106.1) and **d-2a** ( $m/z$  107.1). Reaction conditions: 400  $\mu$ L-scale reaction containing 5  $\mu$ M Mb(H64V,V68A), 10 mM **1** + **d<sub>2</sub>-1**, 10 mM Na<sub>2</sub>S<sub>2</sub>O<sub>4</sub> in phosphate buffer (pH 8.0) at room temperature for 2 hours.

**A)**

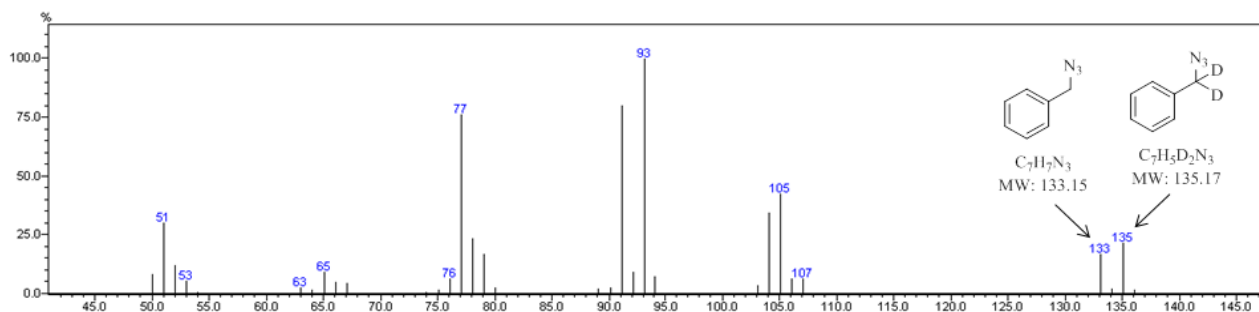

**B)**

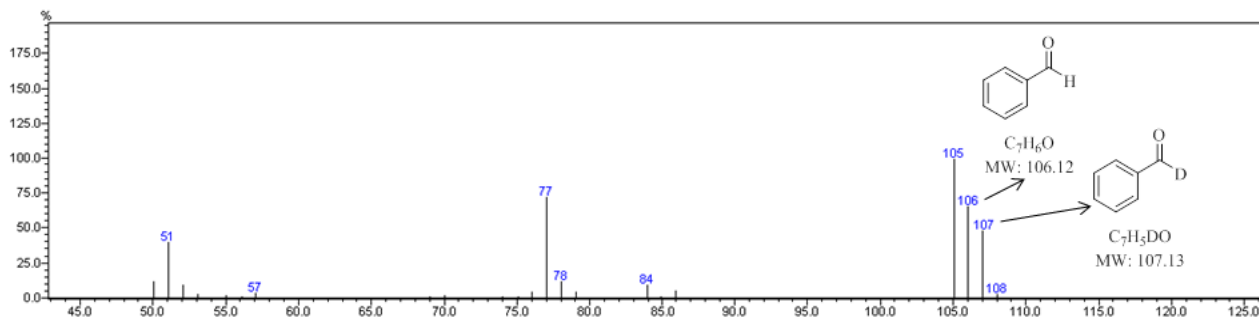

**Figure S5.**  $^{18}\text{O}$  labeling experiments. GC-MS spectrum of benzaldehyde (**2a**) and  $^{18}\text{O}$ -containing benzaldehyde- (**2a**( $^{18}\text{O}$ )) formed upon the reaction of Mb(H64V,V68A) with benzyl azide (**1**) in the presence of 50%  $\text{H}_2^{18}\text{O}$  under standard reaction conditions (1  $\mu\text{M}$  protein, 10 mM benzyl azide, 10 mM sodium dithionite in KPi (50%  $\text{H}_2^{18}\text{O}$ ) at pH 7.0 (not adjusted), room temperature, 24 hours). The isotopic distribution (56 %  $^{16}\text{O}$ , 44%  $^{18}\text{O}$ ) was calculated from integration of the MS signals corresponding to the molecular ions of **2a** ( $m/z$  106.1) and **2a**( $^{18}\text{O}$ ) ( $m/z$  108.1).

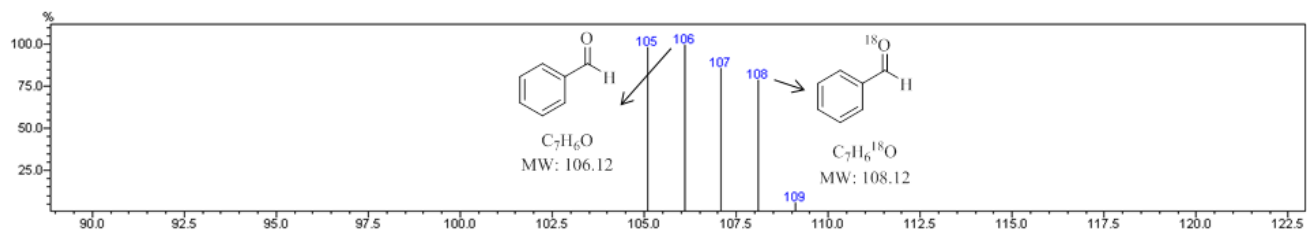

**Figure S6.** Calibration curve for the aldehyde products. All the calibration curves were realized adding a variable concentration of the corresponding aldehyde in methanol (8, 4, 2, 1 and 0.5 mM, respectively) to 400  $\mu$ L of a Kpi solution at pH 7. The mixture was added with the internal standard (benzodioxole, 20  $\mu$ L from a 5 mM stock solution), extracted with dichloromethane (400  $\mu$ L), and analyzed by GC.

**a) Calibration curve for Benzyl azide**

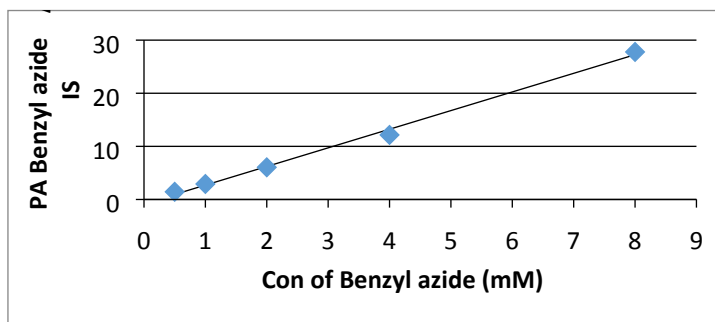

**b) Calibration curve for Benzaldehyde**

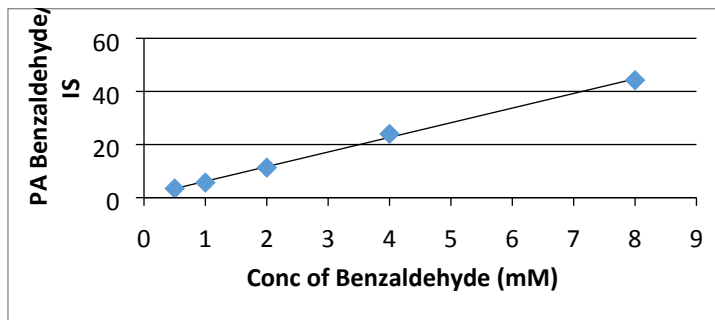

**c) Calibration curve for Benzylamine**

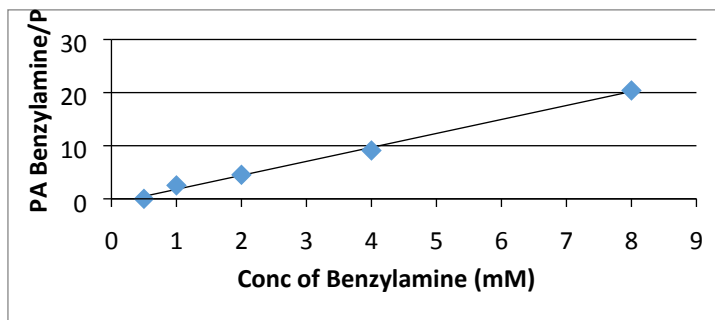

d) Calibration curve for *N*-Benzyl-1-benzylimine

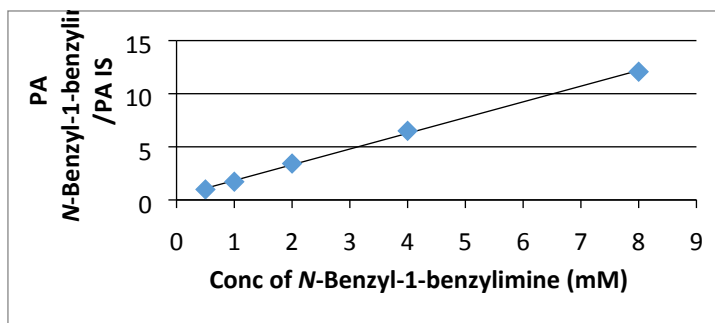

e) Calibration curve for 4-Tolualdehyde

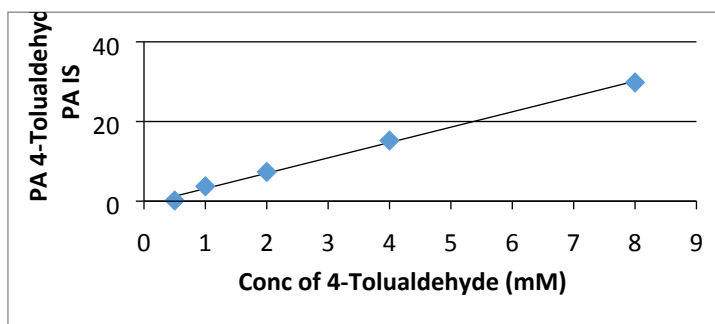

f) Calibration curve for Anisaldehyde

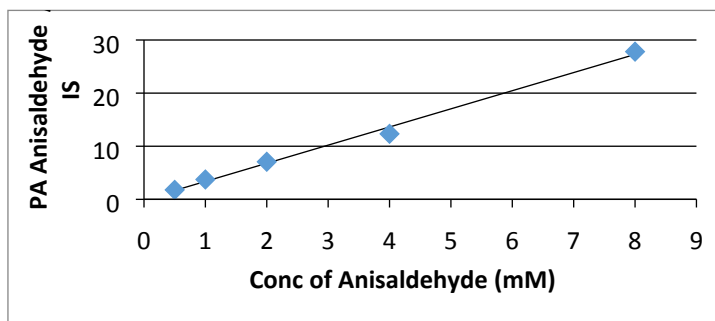

g) Calibration curve for 4-Nitrobenzaldehyde

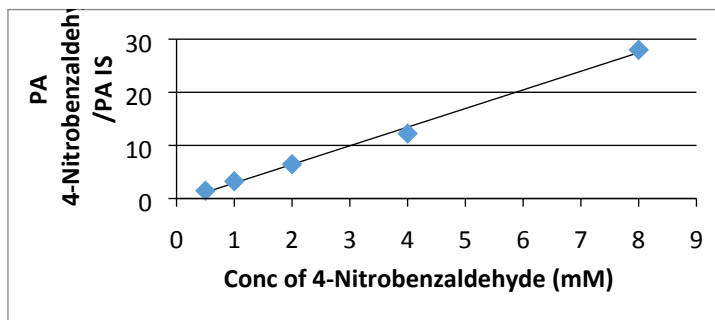



**h) Calibration curve for 4-(Trifluoromethyl)benzaldehyde**

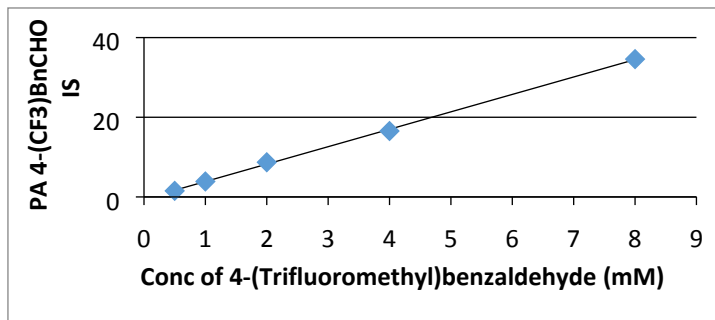

**i) Calibration curve for 2-Tolualdehyde**

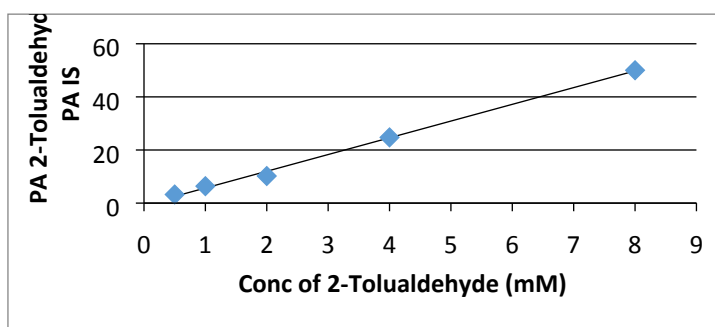

**j) Calibration curve for 2-Fluorobenzaldehyde**

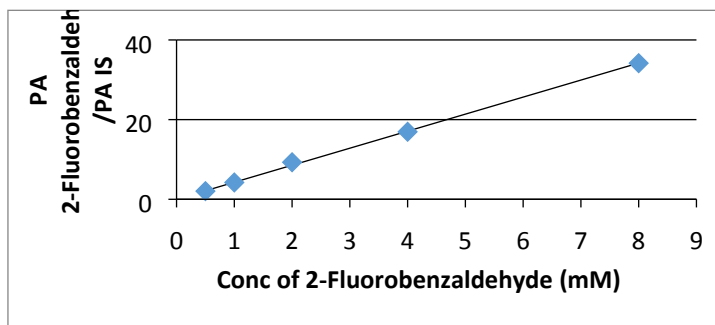

**k) Calibration curve for 2-Nitrobenzaldehyde**

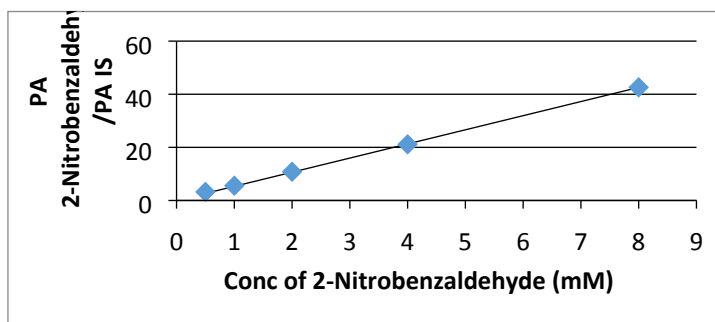

**l) Calibration curve for 3-Nitrobenzaldehyde**

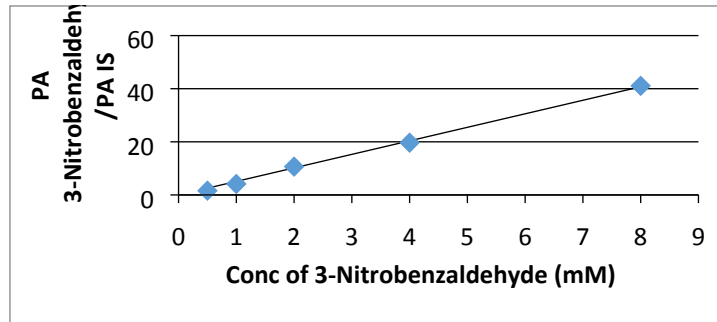

**m) Calibration curve for 2,4-Difluorobenzaldehyde**

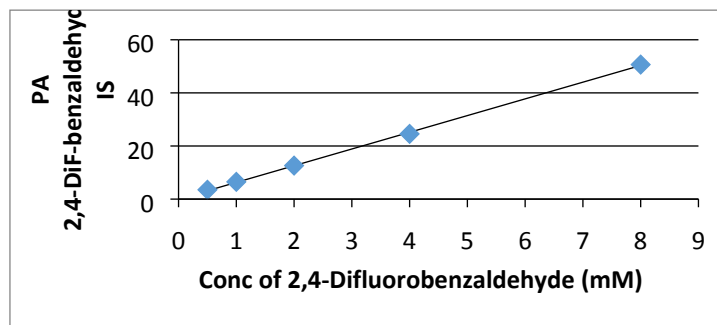

**n) Calibration curve for 3,5-Dimethylbenzaldehyde**

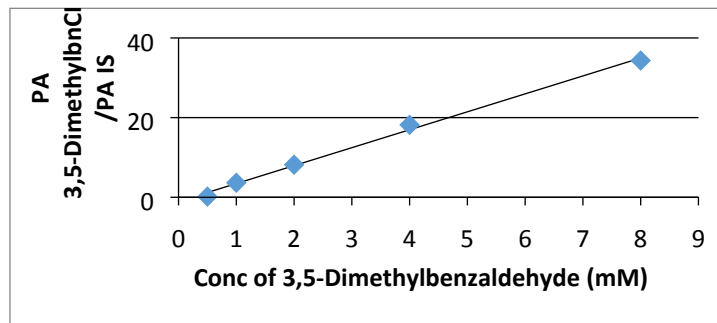

**o) Calibration curve for 2,6-Dichlorobenzaldehyde**

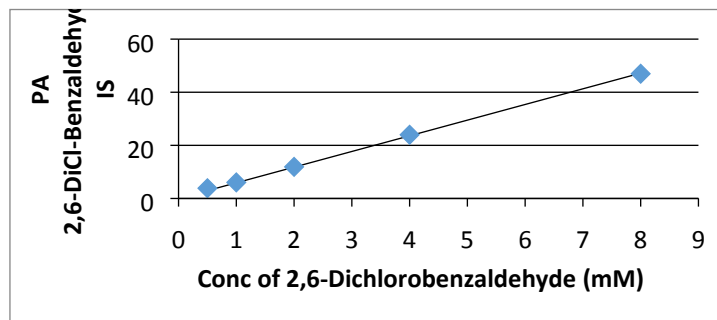

**p) Calibration curve for Acetophenone**

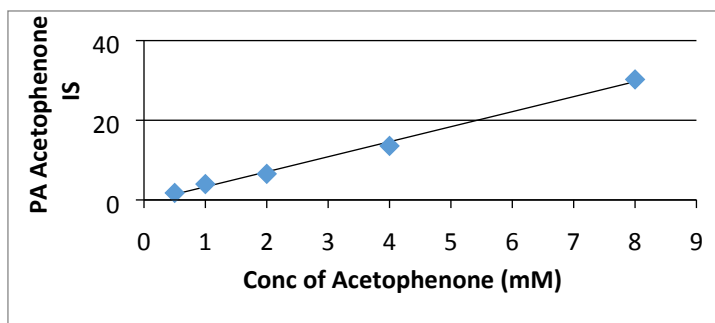

**q) Calibration curve for 1-Naphthaldehyde**

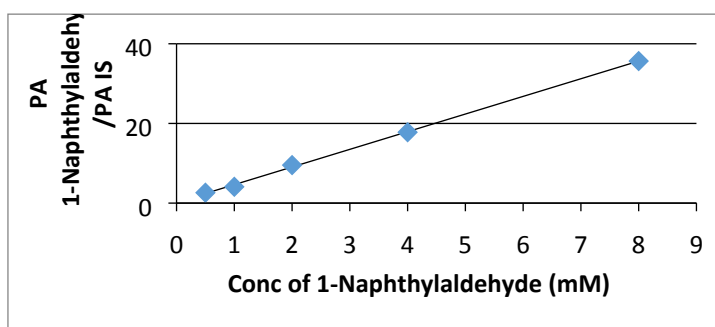

**r) Calibration curve for Thiophene-2-carbaldehyde**

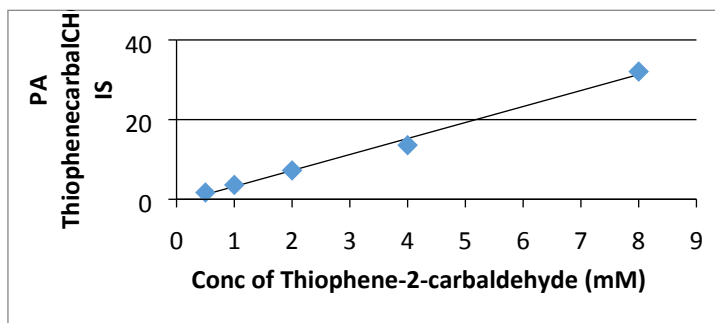

**s) Calibration curve for Cinnamaldehyde**

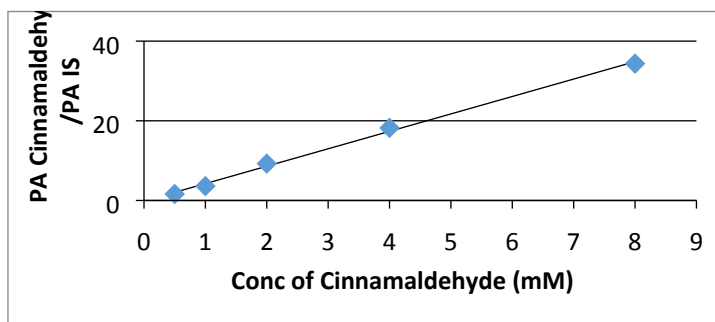

t) Calibration curve for 2-Phenylacetaldehyde

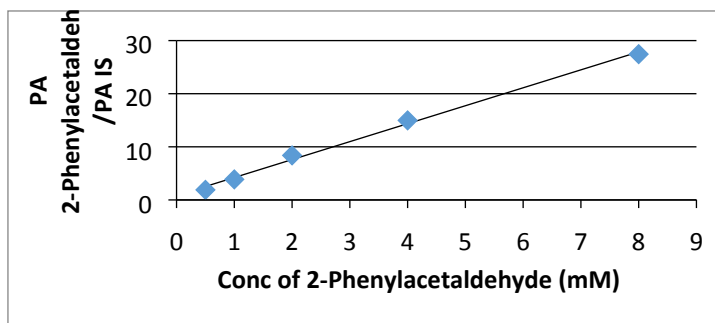

u) Calibration curve for Citral

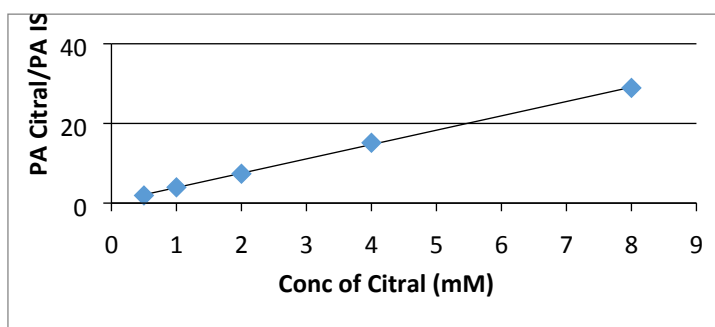

v) Calibration curve for 2,2,2-Trifluoro-1-phenylethan-1-one

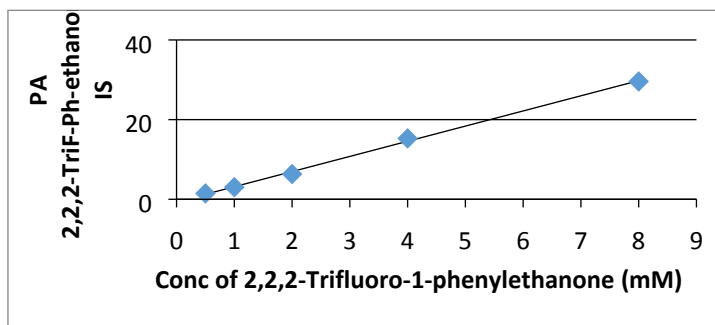

w) Calibration curve for Methyl 2-oxo-2-phenylacetate

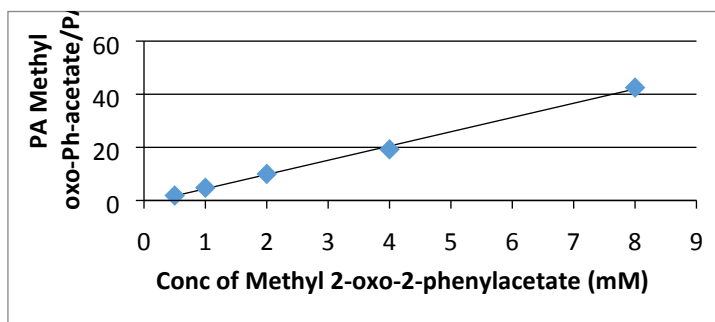

**Figure S7.** SDS-PAGE gel of purified Mb variants. The molecular weight of WT Mb is 18,408 Da.

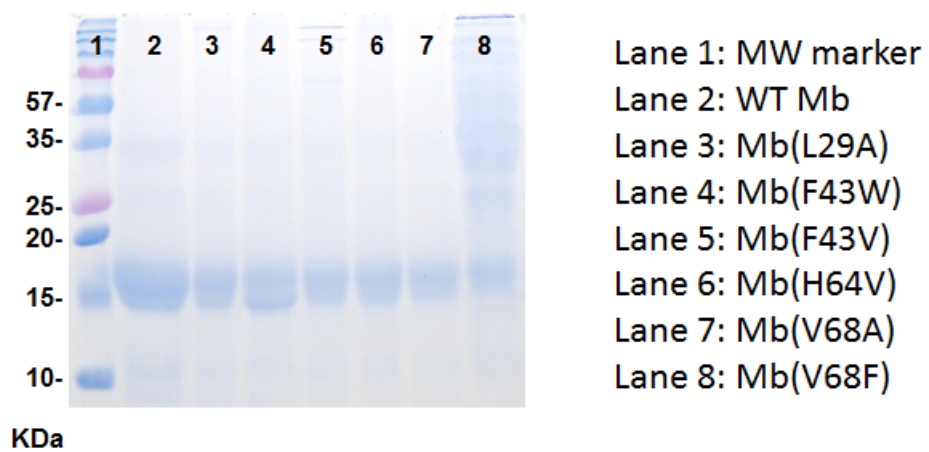

## Experimental Procedures:

**Reagents and Analytical Methods.** All the chemicals and reagents were purchased from commercial suppliers (Sigma-Aldrich, ACS Scientific, Acros, VWR Alfa Aesar) and used without any further purification, unless otherwise stated.  $^{18}\text{O}$ -Water (Normalized, 97.4 atom %) for isotopic labeling experiments was purchased from Icon Isotopes. All dry reactions were carried out under argon atmosphere in oven-dried glassware with magnetic stirring using standard gas-light syringes, cannulae and septa.  $^1\text{H}$  and  $^{13}\text{C}$  NMR spectra were measured on Bruker DPX-400 (operating at 400 MHz for  $^1\text{H}$  and 100 MHz for  $^{13}\text{C}$ ) or Bruker DPX-500 (operating at 500 MHz for  $^1\text{H}$  and 125 MHz for  $^{13}\text{C}$ ).  $^{19}\text{F}$  NMR spectra were measured on Bruker DPX-400 (operating at 376 MHz for  $^{19}\text{F}$ ). Tetramethylsilane (TMS) served as the internal standard (0 ppm) for  $^1\text{H}$  NMR,  $\text{CDCl}_3$  was used as the internal standard (77.0 ppm) for  $^{13}\text{C}$  NMR and trichlorofluoromethane ( $\text{CFCl}_3$ ) was used as the internal standard (0 ppm) for  $^{19}\text{F}$  NMR. Silica gel chromatography purifications were carried out using AMD Silica Gel 60 230-400 mesh. Preparative thin layer chromatography was performed on TLC plates (Merck). Gas chromatography (GC) analyses were carried out using a Shimadzu GC-2010 gas chromatograph equipped with a FID detector and an Agilent J&W GC Chiral Cyclosil-B Column (30 m x 0.25 mm x 0.25  $\mu\text{m}$  film). Separation method: 1  $\mu\text{L}$  injection, injector temp.: 200  $^\circ\text{C}$ , detector temp: 300  $^\circ\text{C}$ . Gradient: column temperature set at 60  $^\circ\text{C}$  for 0.10 min, then to 100  $^\circ\text{C}$  at 60  $^\circ\text{C}/\text{min}$ , to 200  $^\circ\text{C}$  at 8  $^\circ\text{C}/\text{min}$ , to 230  $^\circ\text{C}$  at 30  $^\circ\text{C}/\text{min}$  and then at 230  $^\circ\text{C}$  for 1.0 min. Total run time was 15.27 min. UV-Vis spectra were recorded on a Shimadzu UV-2401PC UV-VIS spectrophotometer, Wavelength Range (nm) from 700 to 300, Scan Speed: Fast, Sampling Interval (nm): 1.0, Scan Mode: Single.

**Retention times (min):**

| Product | Retention time | Product | Retention time | Product | Retention time |
|---------|----------------|---------|----------------|---------|----------------|
| 1       | 5.621          | 8a      | 5.277          | 15a     | 13.511         |
| 2a      | 4.092          | 8b      | 3.625          | 15b     | 10.854         |
| 2b      | 4.723          | 9a      | 12.019         | 16a     | 6.127          |
| 2c      | 14.449         | 9b      | 10.367         | 16b     | 5.048          |
| 3a      | 6.795          | 10a     | 13.458         | 17a     | 3.998          |
| 3b      | 4.589          | 10b     | 10.979         | 17b     | 8.954          |
| 4a      | 9.434          | 11a     | 5.064          | 18a     | 7.564          |
| 4b      | 7.216          | 11b     | 3.225          | 18b     | 5.998          |
| 5a      | 13.831         | 12a     | 7.862          | 19a     | 7.435          |
| 5b      | 10.224         | 12b     | 5.126          | 19b     | 7.915          |
| 6a      | 6.236          | 13a     | 10.340         | 20a     | 5.756          |
| 6b      | 3.998          | 13b     | 9.274          | 20b     | 4.486          |
| 7a      | 6.742          | 14a     | 5.837          | 21a     | 8.581          |
| 7b      | 4.569          | 14b     | 5.170          | 21b     | 6.529          |

**Cloning.** The gene encoding for sperm whale myoglobin was amplified from plasmid pMYO (Addgene plasmid 34626) and cloned into the Nde I/Xho I cassette of plasmid pET22b (Novagen) to give pET22\_MYO. The cloning of the Mb variants was described previously.<sup>[1]</sup>

**Protein expression and purification.** Wild-type Mb and the engineered Mb variants were expressed in *E. coli* BL21(DE3) cells as described previously.<sup>[1]</sup> Briefly, cells were grown in TB medium (ampicillin, 100 mg L<sup>-1</sup>) at 37 °C (150 rpm) until OD<sub>600</sub> reached 0.6. Cells were then induced with 0.25 mM β-d-1-thiogalactopyranoside (IPTG) and 0.3 mM δ-aminolevulinic acid (ALA). After induction, cultures were shaken at 150 rpm and 27 °C and harvested after 20 h by centrifugation at 4000 rpm at 4 °C. After cell lysis by sonication, the proteins were purified by Ni-affinity chromatography using the following buffers: loading buffer (50 mM Kpi, 800 mM NaCl, pH 7.0), wash buffer 1 (50 mM Kpi, 800 mM NaCl, pH 6.2), wash buffer 2 (50 mM Kpi, 800 mM NaCl, 250 mM glycine, pH 7.0) and elution buffer (50 mM Kpi, 800 mM NaCl, 300 mM L-histidine, pH 7.0). After buffer exchange (50 mM Kpi, pH 7.0), the proteins were stored at +4 °C. Protein concentration was determined using the CO-bound form of the hemoprotein and the extinction coefficient ( $\epsilon_{422}$ ) of 164 mM<sup>-1</sup> cm<sup>-1</sup>. Protein purity was confirmed by SDS-PAGE analysis under denaturing conditions (**Figure S7**).

**Mb reactions.** A typical reaction was carried out at a 400  $\mu\text{L}$  scale in KPi buffer (50 mM) using 1  $\mu\text{M}$  catalyst and 10 mM sodium dithionite. A solution containing sodium dithionite (100 mM stock solution) in KPi buffer (50 mM, pH 7.0) was degassed by bubbling argon into the mixture for 3 min in a sealed vial. A separate vial containing the catalyst was carefully degassed in a similar manner. The solution was transferred to the catalyst-containing vial via cannulation. Reaction was initiated by addition of a 10 mM solution of the appropriate azide (200 mM stock solution in methanol, final percentage of methanol 5% v/v), with a syringe, and the reaction mixture was stirred for 24 h at 25  $^{\circ}\text{C}$ , under positive argon pressure.

**Product analysis.** The reactions were analyzed by adding 20  $\mu\text{L}$  of internal standard (benzodioxole, 5 mM in methanol) to the reaction mixture, followed by extraction with 400  $\mu\text{L}$  of dichloromethane and analyzed by GC-FID (see **Reagents and Analytical Methods** section for details on GC analyses). Calibration curves (see **Supplementary Figure S5**) for quantification of the different products were constructed using authentic standards produced synthetically as described in **Synthetic Procedures**, or purchased as described in **Reagents and Analytical Methods**. All measurements were performed at least in duplicate.

**$^{18}\text{O}$  labeling experiments.** For the  $^{18}\text{O}$  incorporation experiment, reactions were carried out at a 400  $\mu\text{L}$  scale in KPi buffer (pH 7.0) containing 50%  $\text{H}_2^{18}\text{O}$  using 1  $\mu\text{M}$  Mb(H64V,V68A), 10 mM sodium dithionite, and 10 mM benzyl azide in methanol (5% v/v) under an argon atmosphere. The reactions were gently stirred 24 hours at 25  $^{\circ}\text{C}$ , then added of 20  $\mu\text{L}$  of internal standard (benzodioxole, 5 mM in methanol). The products were extracted with 400  $\mu\text{L}$  of dichloromethane and analyzed by GC-MS as described above.



## Synthetic Procedures:

**Synthesis of azides ( $d_2$ -1,3-21a).** To a stirred solution of the appropriate benzyl bromide (5 mmol) in anhydrous DMF (10 mL) in argon atmosphere was added  $\text{NaN}_3$  (7.5 mmol) at 25 °C. The reaction mixture was then stirred for 6h at 64 °C. After the reaction was complete, reaction mixture was quenched with water and extracted with  $\text{Et}_2\text{O}$ . Combined organic layers were concentrated *in vacuo* and the residue obtained was purified by flash chromatography on silica gel to obtain pure azides  $d_2$ -1,3-21a in variable yields.

## Characterization Data:

### (Azidomethyl- $d_2$ )benzene ( $d_2$ -1):

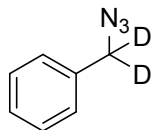

Following the standard procedure, yield (99%),  $R_f = 0.81$  (in *n*-hexane);  $^1\text{H}$  NMR (400 MHz,  $\text{CDCl}_3$ ):  $\delta$  7.51-7.39(m, 5H);  $^{13}\text{C}$  NMR (100 MHz,  $\text{CDCl}_3$ ):  $\delta$  137.4, 128.8, 128.5, 128.2, 33.0.

### (1-(Azidomethyl)-4-methylbenzene (3a):

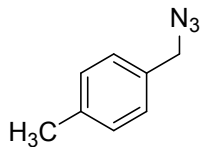

Following the standard procedure, yield 97%,  $R_f = 0.70$  (in *n*-hexane);  $^1\text{H}$  NMR (400 MHz,  $\text{CDCl}_3$ ):  $\delta$  7.25-7.20 (m, 4H), 4.30 (s, 2H), 2.38 (s, 3H);  $^{13}\text{C}$  NMR (100 MHz,  $\text{CDCl}_3$ ):  $\delta$  138.1, 132.2, 129.4, 128.2, 54.7, 21.2.

### 1-(Azidomethyl)-4-methoxybenzene (4a):

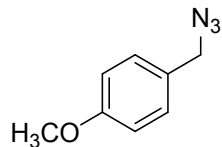

Following the standard procedure, yield 97%,  $R_f = 0.68$  (in *n*-hexane);  $^1\text{H}$  NMR (400 MHz,  $\text{CDCl}_3$ ):  $\delta$  7.24 (d, 2H,  $J = 7.7$  Hz), 6.91 (d, 2H,  $J = 7.8$  Hz), 4.26 (s, 2H), 3.81 (s, 3H);  $^{13}\text{C}$  NMR (100 MHz,  $\text{CDCl}_3$ ):  $\delta$  159.5, 129.7, 127.3, 114.1, 55.2, 54.3.

**1-(Azidomethyl)-4-nitrobenzene (5a):**

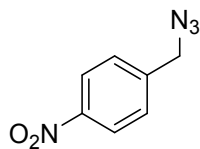

Following the standard procedure, yield 95%,  $R_f = 0.74$  (in 20% EtOAc in *n*-hexane);  $^1\text{H}$  NMR (400 MHz,  $\text{CDCl}_3$ ):  $\delta$  8.14 (d, 2H,  $J = 7.9$  Hz), 7.45 (d, 2H,  $J = 7.8$  Hz), 4.47 (s, 2H);  $^{13}\text{C}$  NMR (100 MHz,  $\text{CDCl}_3$ ):  $\delta$  140.8, 128.7, 128.0, 126.3, 61.0, 31.5.

**1-(Azidomethyl)-4-(trifluoromethyl)benzene (6a):**

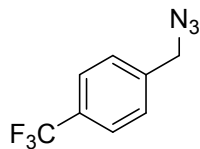

Following the standard procedure, yield 96.9%,  $R_f = 0.91$  (in 10% EtOAc in *n*-hexane);  $^1\text{H}$  NMR (500 MHz,  $\text{CDCl}_3$ ):  $\delta$  7.65 (d, 2H,  $J = 7.5$  Hz), 7.44 (d, 2H,  $J = 8$  Hz), 4.43 (s, 2H);  $^{13}\text{C}$  NMR (125 MHz,  $\text{CDCl}_3$ ):  $\delta$  139.4, 128.2 (2C), 125.9, 125.8 (2C), 54.1;  $^{19}\text{F}$  NMR (376 MHz,  $\text{CDCl}_3$ ):  $\delta$  -0.2.

**1-(Azidomethyl)-2-methylbenzene (7a):**

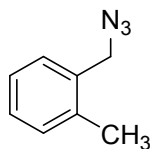

Following the standard procedure, yield 98%,  $R_f = 0.73$  (in *n*-hexane);  $^1\text{H}$  NMR (400 MHz,  $\text{CDCl}_3$ ):  $\delta$  7.26-7.23 (m, 4H), 4.36 (s, 2H), 2.38 (s, 3H);  $^{13}\text{C}$  NMR (100 MHz,  $\text{CDCl}_3$ ):  $\delta$  136.8, 133.3, 130.6, 129.2, 128.6, 126.2, 52.9, 18.9.

**1-(Azidomethyl)-2-fluorobenzene (8a):**

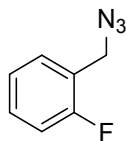

Following the standard procedure, yield 74.7%,  $R_f = 0.46$  (in 10% EtOAc in *n*-hexane);  $^1\text{H}$  NMR (500 MHz,  $\text{CDCl}_3$ ):  $\delta$  7.36-7.32 (m, 2H), 7.17 (t, 1H,  $J = 7.5$  Hz), 7.10 (t, 1H,  $J = 9.5$  Hz), 4.41 (s, 2H);  $^{13}\text{C}$  NMR (125 MHz,  $\text{CDCl}_3$ ):  $\delta$  160.8 (d,  $J = 246.5$  Hz), 130.4 (d,  $J = 3.7$  Hz), 130.3 (d,  $J = 8.1$  Hz), 124.4 (d,  $J = 3.6$  Hz), 122.7 (d,  $J = 15.1$  Hz), 115.6 (d,  $J = 21.0$  Hz), 48.5 (d,  $J = 3.2$  Hz);  $^{19}\text{F}$  NMR (376 MHz,  $\text{CDCl}_3$ ):  $\delta$  -55.5;

**1-(Azidomethyl)-2-nitrobenzene (9a):**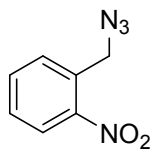

Following the standard procedure, yield 12.8%,  $R_f = 0.41$  (in 10% EtOAc in *n*-hexane);  $^1\text{H}$  NMR (500 MHz,  $\text{CDCl}_3$ ):  $\delta$  8.12 (d, 1H,  $J = 8.0$  Hz), 7.68-7.66 (m, 2H), 7.51 (t, 1H,  $J = 7.0$  Hz), 4.85 (s, 2H);  $^{13}\text{C}$  NMR (125 MHz,  $\text{CDCl}_3$ ):  $\delta$  133.9, 131.6, 130.1, 129.0, 126.5, 51.9.

**1-(Azidomethyl)-3-nitrobenzene (10a):**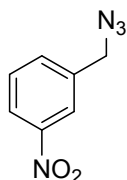

Following the standard procedure, yield 91.1%,  $R_f = 0.29$  (in 10% EtOAc in *n*-hexane);  $^1\text{H}$  NMR (500 MHz,  $\text{CDCl}_3$ ):  $\delta$  8.20 (m, 2H), 7.67 (d, 1H,  $J = 7.5$  Hz), 7.58 (t, 1H,  $J = 8.5$  Hz), 4.50 (s, 2H);  $^{13}\text{C}$  NMR (125 MHz,  $\text{CDCl}_3$ ):  $\delta$  148.5, 137.6, 133.8, 129.9, 123.4, 122.8, 53.7.

**1-(Azidomethyl)-2,4-difluorobenzene (11a):**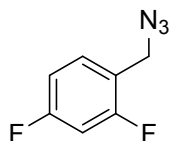

Following the standard procedure, yield 99%,  $R_f = 0.38$  (in 10% EtOAc in *n*-hexane);  $^1\text{H}$  NMR (500 MHz,  $\text{CDCl}_3$ ):  $\delta$  7.34-7.29 (m, 1H), 6.92-6.85 (m, 2H), 4.37 (s, 2H);  $^{13}\text{C}$  NMR (125 MHz,  $\text{CDCl}_3$ ):  $\delta$  164.0 (d,  $J = 247.7$  Hz), 161.0 (d,  $J = 248.6$  Hz), 131.3 (d,  $J = 15.1$  Hz), 118.7 (d,  $J = 15.5$  Hz), 111.6 (d,  $J = 21.3$  Hz), 104.2 (t,  $J = 25.1$ ), 48.0 (d,  $J = 2.3$  Hz);  $^{19}\text{F}$  NMR (376 MHz,  $\text{CDCl}_3$ ):  $\delta$  -46.6, -51.0;

**1-(Azidomethyl)-3,5-dimethylbenzene (12a):**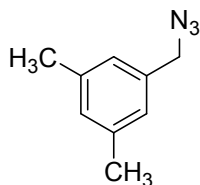

Following the standard procedure, yield 99%,  $R_f = 0.72$  (in *n*-hexane);  $^1\text{H}$  NMR (400 MHz,  $\text{CDCl}_3$ ):  $\delta$  7.06 (s, 1H), 7.01 (s, 2H), 4.31 (s, 2H), 2.41 (s, 3H);  $^{13}\text{C}$  NMR (100 MHz,  $\text{CDCl}_3$ ):  $\delta$  138.2, 129.1, 135.8, 129.9, 125.2, 54.6, 21.1.

**2-(Azidomethyl)-1,3-dichlorobenzene (13a):**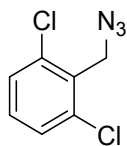

Following the standard procedure, yield 91.8%,  $R_f = 0.42$  (in 10% EtOAc in *n*-hexane);  $^1\text{H NMR}$  (500 MHz,  $\text{CDCl}_3$ ):  $\delta$  7.37 (d, 2H,  $J = 8.0$  Hz), 7.23 (t, 1H,  $J = 8$  Hz), 4.68 (s, 2H);  $^{13}\text{C NMR}$  (125 MHz,  $\text{CDCl}_3$ ):  $\delta$  136.4 (2C), 131.5, 130.3, 128.5 (2C), 49.2.

**(±)-(1-Azidoethyl)benzene (14a):**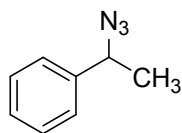

Following the standard procedure, yield 96%,  $R_f = 0.81$  (in *n*-hexane);  $^1\text{H NMR}$  (400 MHz,  $\text{CDCl}_3$ ):  $\delta$  7.43-7.25 (m, 5H), 4.64 (q, 1H,  $J = 7.9$  Hz), 1.57 (d, 3H,  $J = 8.2$  Hz);  $^{13}\text{C NMR}$  (100 MHz,  $\text{CDCl}_3$ ):  $\delta$  140.8, 128.7, 128.0, 126.3, 61.0, 31.5.

**1-(Azidomethyl)naphthalene (15a):**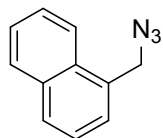

Following the standard procedure, yield 98%,  $R_f = 0.72$  (in *n*-hexane);  $^1\text{H NMR}$  (400 MHz,  $\text{CDCl}_3$ ):  $\delta$  8.06-7.87 m, 3H), 7.61-7.47 (m, 4H), 4.77 (s, 2H);  $^{13}\text{C NMR}$  (100 MHz,  $\text{CDCl}_3$ ):  $\delta$  133.9, 131.3, 130.9, 129.4, 128.8, 127.2, 126.7, 126.1, 125.2, 123.4, 52.9.

**2-(Azidomethyl)thiophene (16a):**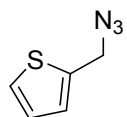

Following the standard procedure, yield 73%,  $R_f = 0.74$  (in 15% EtOAc in *n*-hexane);  $^1\text{H NMR}$  (400 MHz,  $\text{CDCl}_3$ ):  $\delta$  7.32 (s, 1H), 7.04 (d, 2H,  $J = 7.8$  Hz), 4.50 (s, 2H);  $^{13}\text{C NMR}$  (100 MHz,  $\text{CDCl}_3$ ):  $\delta$  137.1, 127.2, 127.0, 126.3, 48.9.

**Cinnamyl azide (17a):**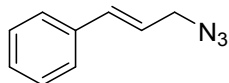

Following the standard procedure, yield 95.1%,  $R_f = 0.87$  (in 10% EtOAc in *n*-hexane);  $^1\text{H NMR}$  (500 MHz,  $\text{CDCl}_3$ ):  $\delta$  7.41 (d, 2H,  $J = 7.5$  Hz), 7.34 (t, 2H,  $J = 7.5$  Hz), 7.27 (d, 1H,  $J = 10.5$  Hz), 6.66 (d, 1H,  $J = 16$  Hz), 6.26-6.23 (m, 1H), 3.95 (d, 2H,  $J = 6$  Hz);  $^{13}\text{C NMR}$  (125 MHz,  $\text{CDCl}_3$ ):  $\delta$  136.0, 134.5, 128.6 (2C), 128.2, 126.6 (2C), 122.4, 53.0.

**(2-Azidoethyl)benzene (18a):**

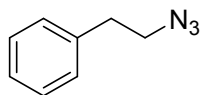

Following the standard procedure, yield 93%,  $R_f = 0.81$  (in 10% EtOAc in *n*-hexane);  $^1\text{H}$  NMR (400 MHz,  $\text{CDCl}_3$ ):  $\delta$  7.46-7.32 (m, 5H), 3.55 (t, 2H,  $J = 7.9$  Hz), 2.97 (t, 2H,  $J = 7.8$  Hz);  $^{13}\text{C}$  NMR (100 MHz,  $\text{CDCl}_3$ ):  $\delta$  137.7, 128.4, 128.2, 126.4, 51.9, 34.9.

**Geranyl azide (19a):**

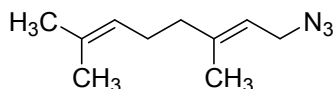

Following the standard procedure, yield 74.5%,  $R_f = 0.51$  (in 100% *n*-hexane);  $^1\text{H}$  NMR (500 MHz,  $\text{CDCl}_3$ ):  $\delta$  5.33 (t, 1H,  $J = 7.5$  Hz), 5.09 (t, 1H,  $J = 5.5$  Hz), 3.76 (t, 2H,  $J = 9$  Hz), 2.13-2.10 (m, 4H), 1.70 (s, 3H), 1.68 (s, 2H), 1.61 (s, 3H);  $^{13}\text{C}$  NMR (125 MHz,  $\text{CDCl}_3$ ):  $\delta$  143.1, 131.9, 123.5, 117.9, 48.0, 39.5, 26.3, 25.6, 17.7, 16.4.

**(±)-(1-Azido-2,2,2-trifluoroethyl)benzene (20a):**

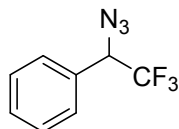

Following the standard procedure, yield 78.8%,  $R_f = 0.81$  (in 10% EtOAc in *n*-hexane);  $^1\text{H}$  NMR (500 MHz,  $\text{CDCl}_3$ ):  $\delta$  7.40-7.32 (m, 5H), 4.64-4.60 (m, 1H), 1.54 (d, 3H,  $J = 7$  Hz);  $^{13}\text{C}$  NMR (125 MHz,  $\text{CDCl}_3$ ):  $\delta$  140.8, 128.7 (2C), 128.1, 126.3 (2C), 61.1, 21.5.

**(±)-Methyl 2-azido-2-phenylacetate (21a):**

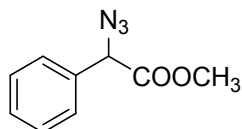

Following the standard procedure, yield 2.1%,  $R_f = 0.19$  (in 33% DCM in *n*-hexane);  $^1\text{H}$  NMR (500 MHz,  $\text{CDCl}_3$ ):  $\delta$  8.01 (d, 2H,  $J = 8$  Hz), 7.66 (t, 1H,  $J = 7.5$  Hz), 7.51 (t, 2H,  $J = 8$  Hz), 7.28-7.26 (m, 1H), 3.98 (s, 3H);  $^{13}\text{C}$  NMR (125 MHz,  $\text{CDCl}_3$ ):  $\delta$  164.0, 133.9, 129.2, 128.5, 127.1, 126.9, 52.0.

**Synthesis of Citral (22):** to a stirred solution of pyridinium chlorocromate (419 mg, 1.9 mmol) in anhydrous dichlorometane (5 mL) under argon atmosphere at 25 °C was added a solution of commercially available geraniol (200 mg, 1.3 mmol) in anhydrous dichloromethane (5 mL) and the mixture was kept in agitation for 3h at 25 °C. After monitoring the consumption of starting material by TLC, the reaction mixture was directly evaporates under reduced pressure and purified by flash chromatography on silica gel (eluting mixture 10% EtOAc in *n*-Hexane) to obtain the desired product as colorless oil (yield 91%, 180 mg, 65/35 trans/cis mixture according by <sup>1</sup>H-NMR).

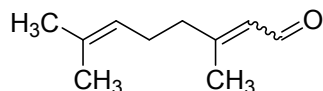

$R_f = 0.84$  (in 10% EtOAc in *n*-hexane); <sup>1</sup>H NMR (500 MHz, CDCl<sub>3</sub>): δ 9.95 (d, 1H,  $J = 10.5$  Hz, trans), 9.85 (d, 1H,  $J = 8.5$  Hz, cis), 5.84 (d, 1H,  $J = 8.0$  Hz), 5.06-5.03 (m, 1H, trans/cis), 2.20-2.15 (m, 4H), 2.15 (s, 3H), 1.64 (s, 3H), 1.57 (s, 3H, trans), 1.55 (s, 3H, cis); <sup>13</sup>C NMR (125 MHz, CDCl<sub>3</sub>): δ 191.2 (trans), 190.7 (cis), 163.7 (trans/cis), 133.6 (cis), 132.8 (trans), 128.6 (cis), 127.3 (trans), 122.5 (trans), 122.2 (cis), 32.5 (trans/cis), 27.0 (trans/cis), 25.7 (cis), 25.6 (trans), 17.6 (trans/cis), 17.5 (trans/cis).

**Synthesis of *N*-benzyl-1-phenylmethanimine (2c):** to a stirred solution of commercially available benzaldehyde (509 μL, 4.7 mmol) and benzyl amine (472 μL, 4.7 mmol) in anhydrous methanol (10 mL) were added 3 drops of glacial acetic acid and the reaction mixture was stirred at 25 °C for 12h. After monitoring the total consumption of the starting material, the methanol was evaporated under reduced pressure and the crude product was purified by flash chromatography on silica gel (eluting mixture 100% dichloromethane) to obtain the desired product as a colorless oil (yield 92%, 838 mg).

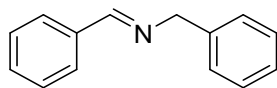

$R_f = 0.84$  (in 100% in DCM); <sup>1</sup>H NMR (500 MHz, CDCl<sub>3</sub>): δ 8.40 (s, 1H), 7.80-7.78 (m, 2H), 7.43 (s, 3H), 7.36-7.35 (m, 4H), 7.27-7.26 (m, 1H), 4.83 (s, 2H); <sup>13</sup>C NMR (125 MHz, CDCl<sub>3</sub>): δ 161.9, 130.7, 129.7, 129.0, 128.6 (2C), 128.5 (2C), 128.2 (2C), 127.9 (2C), 127.0, 65.0.

## References:

- [1] M. Bordeaux, V. Tyagi, R. Fasan, *Angew. Chem. Int. Ed.* 2015, 54, 1744–1748.
- [2] M. Bordeaux, R. Singh, R. Fasan, *Bioorg. Med. Chem.* 2014, 22, 5697-5704.

Spectra:

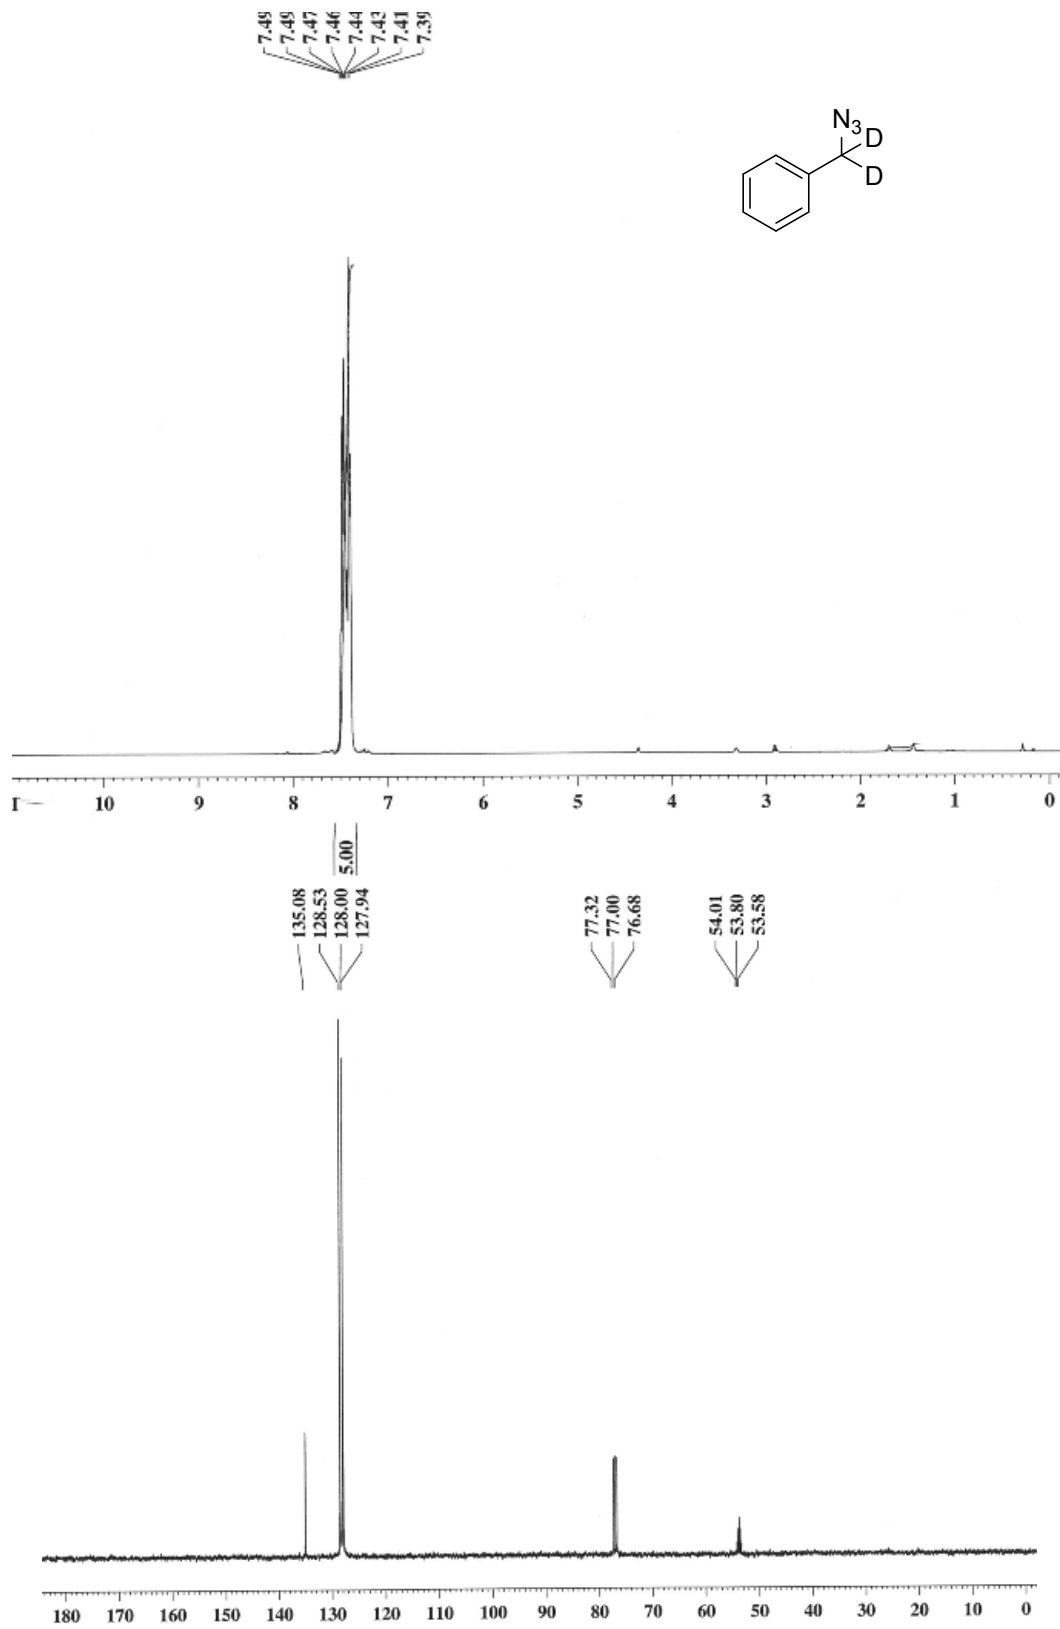



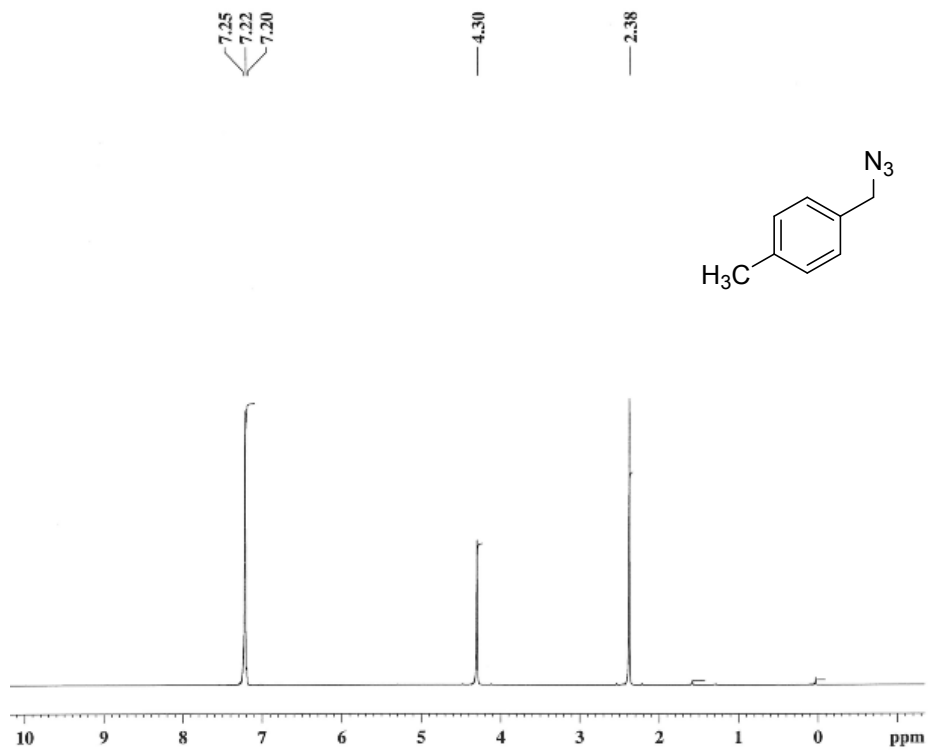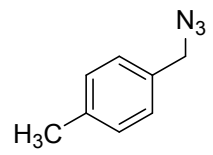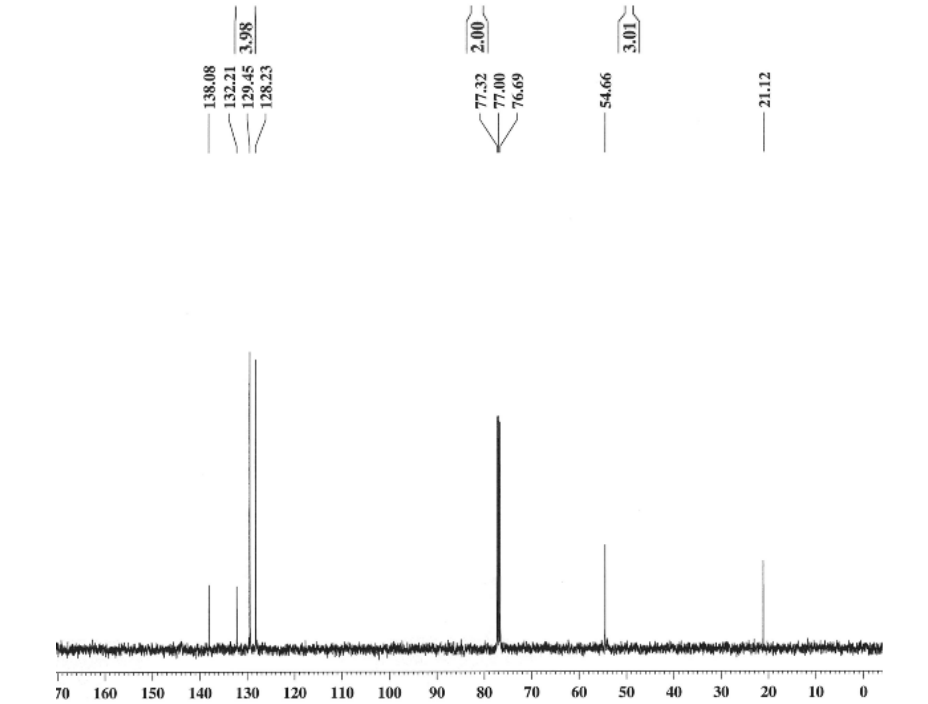

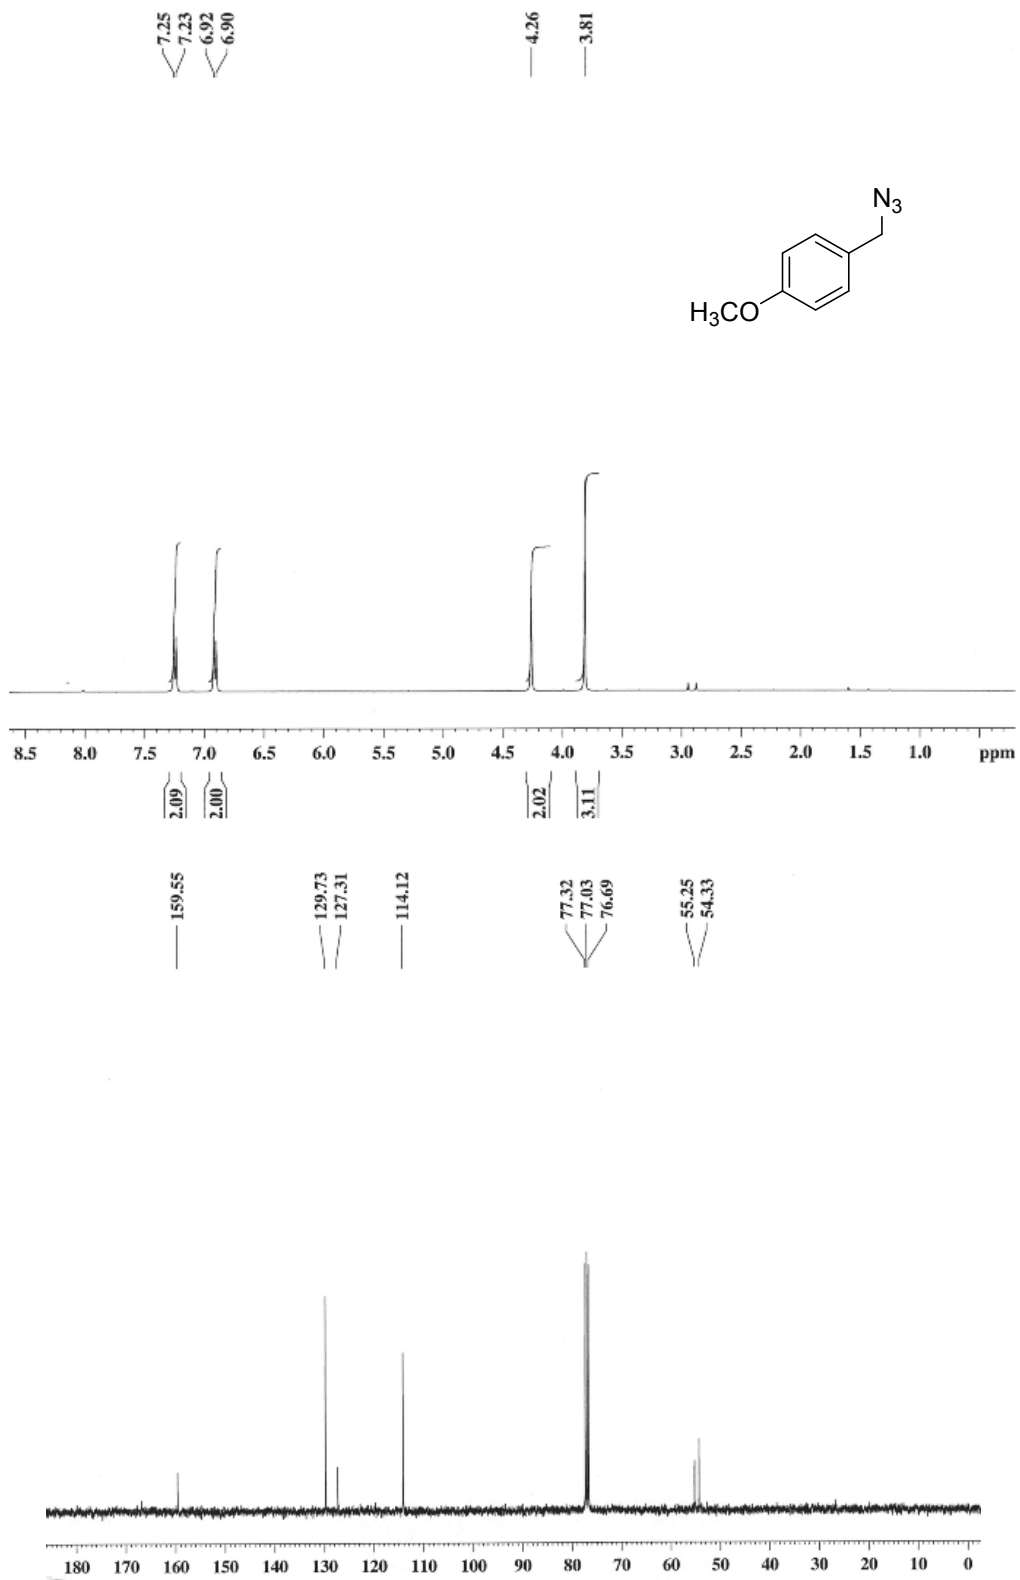

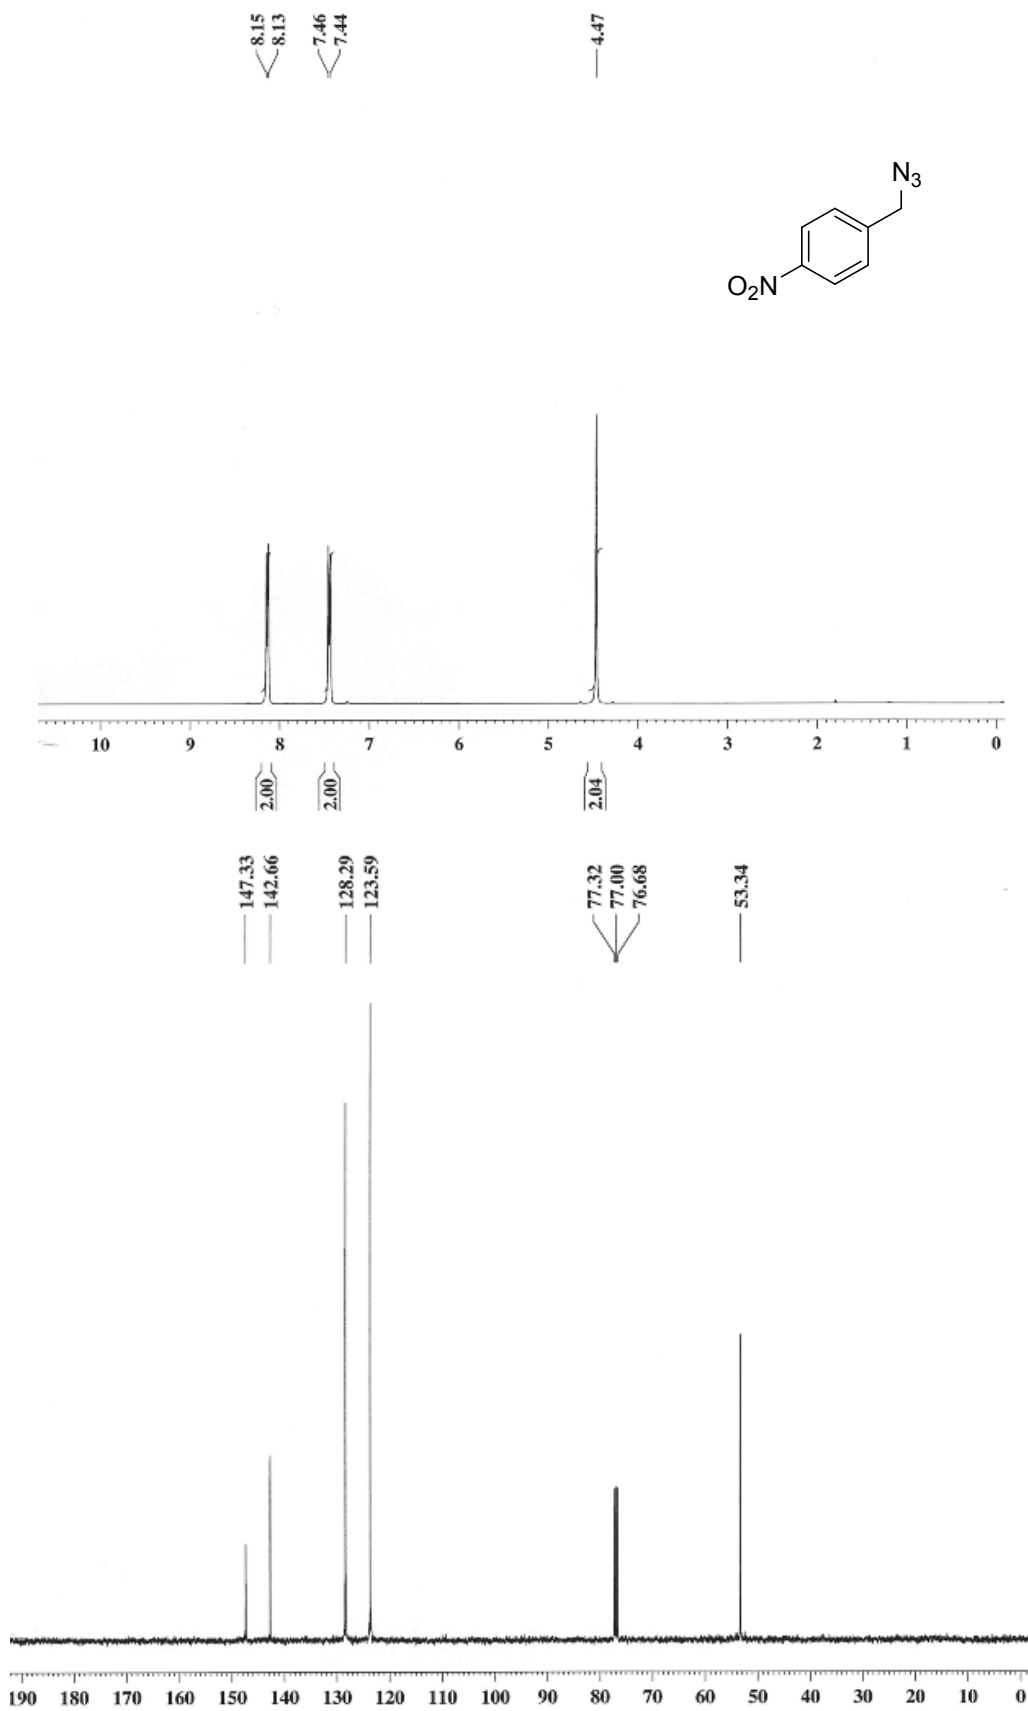

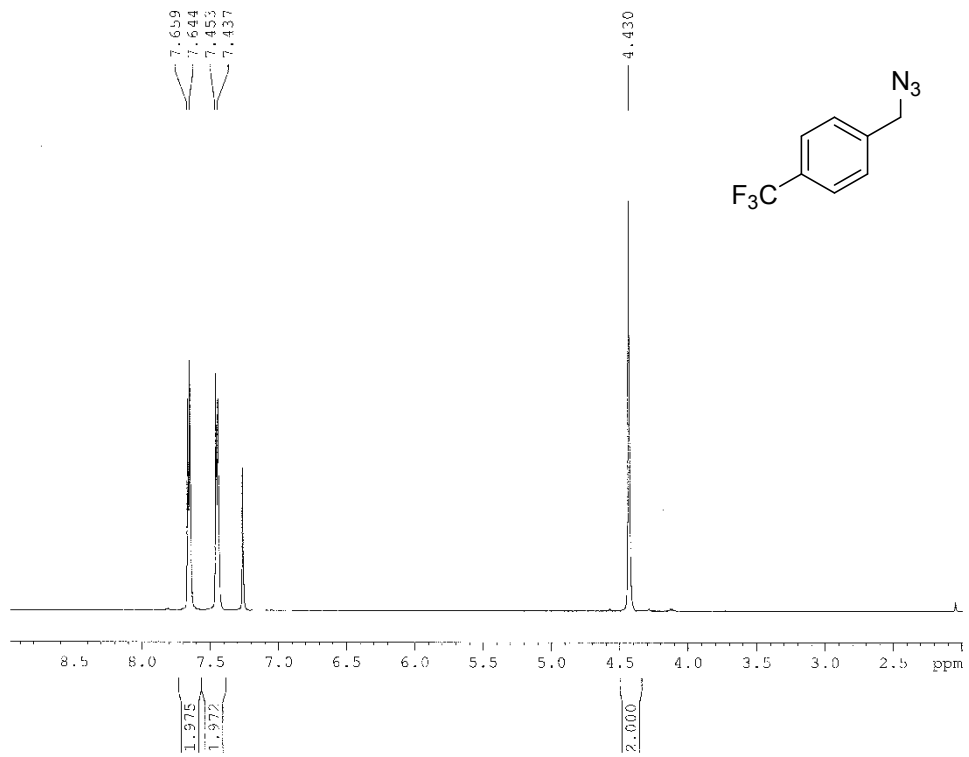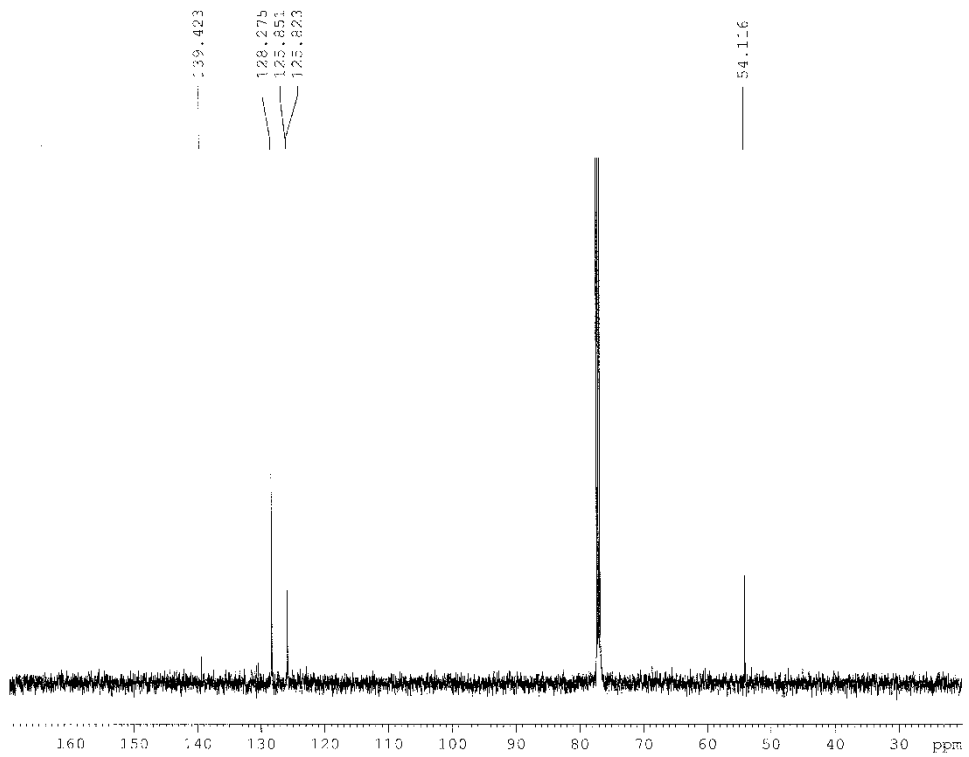

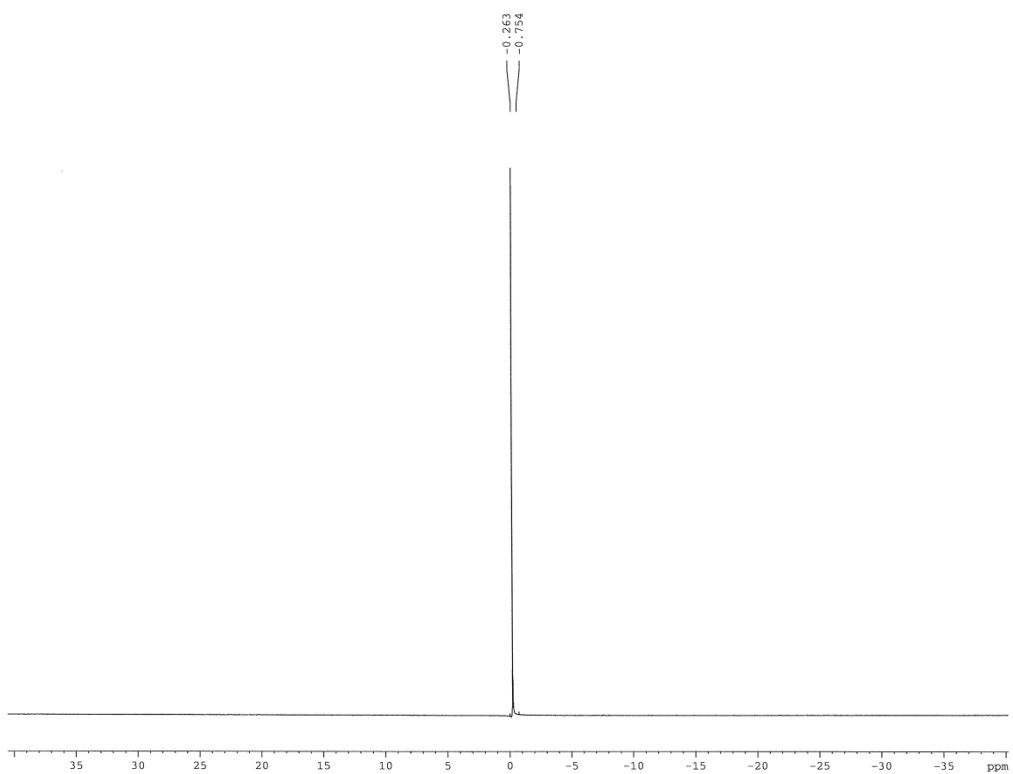

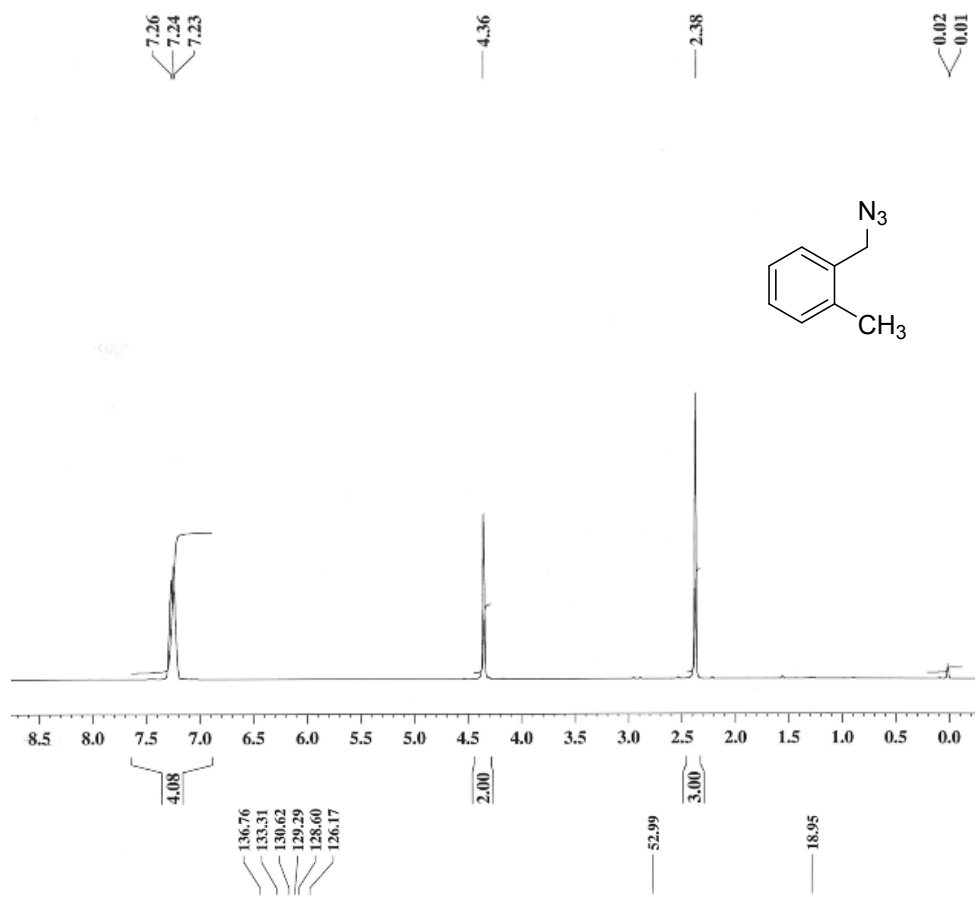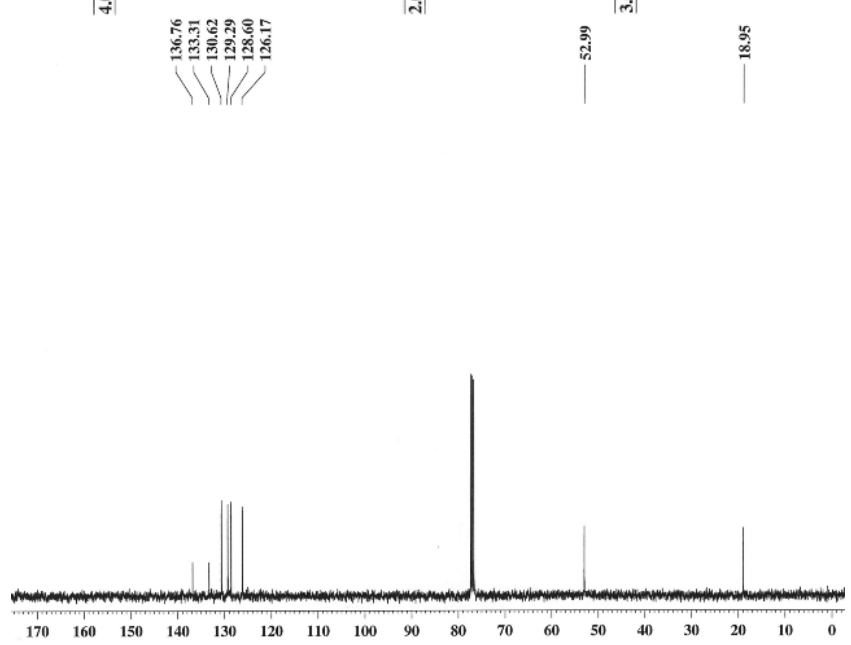

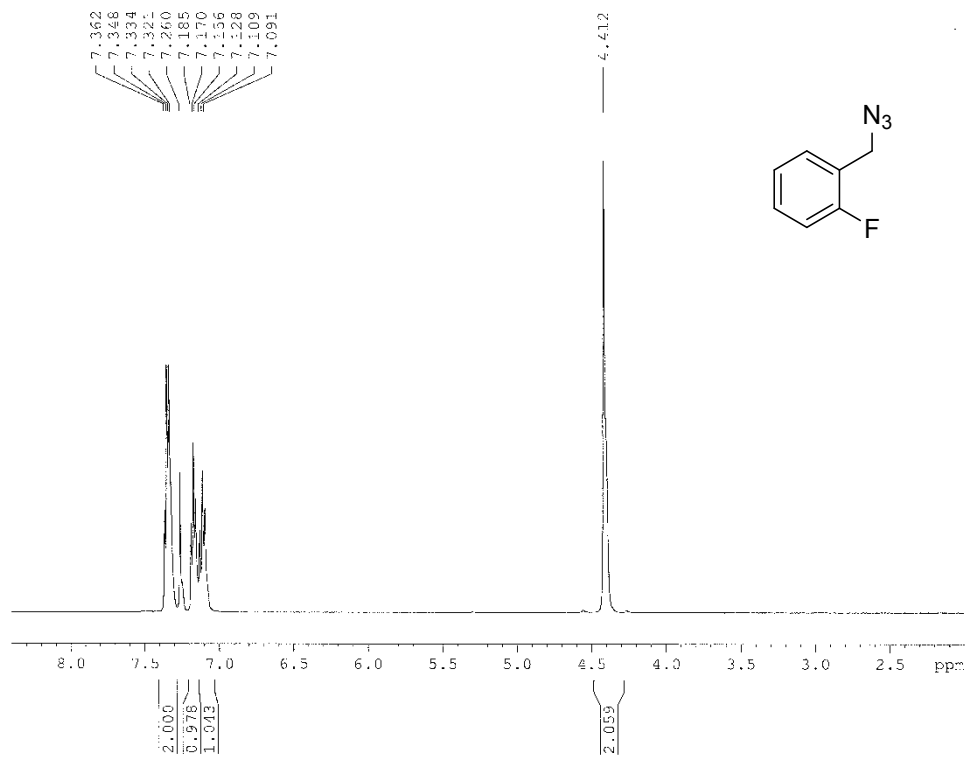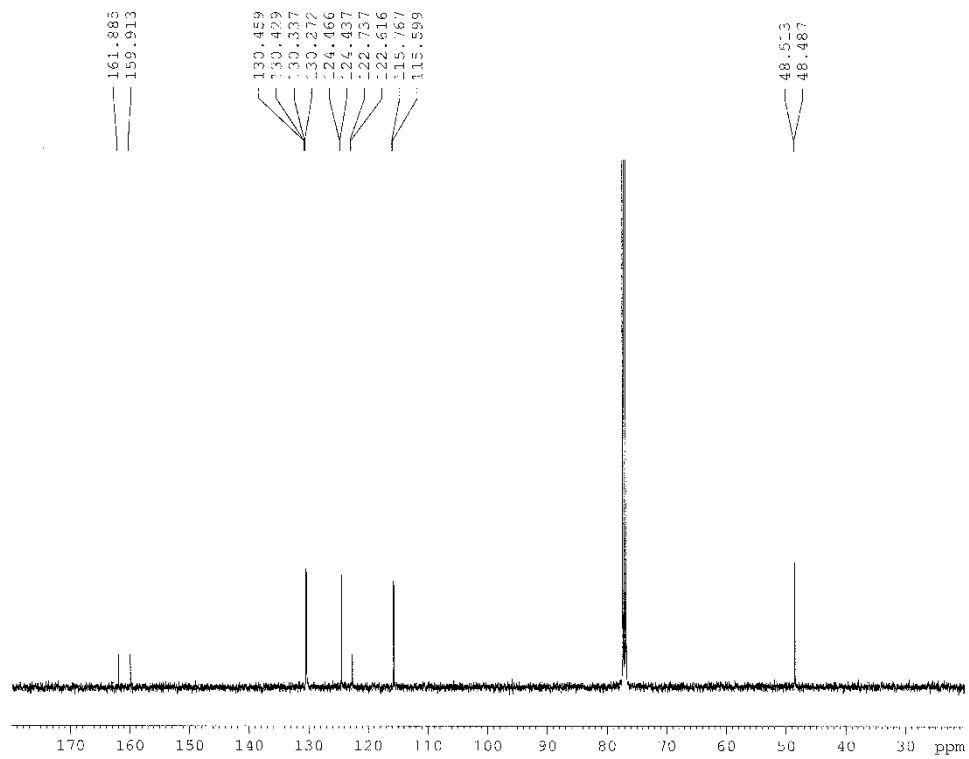

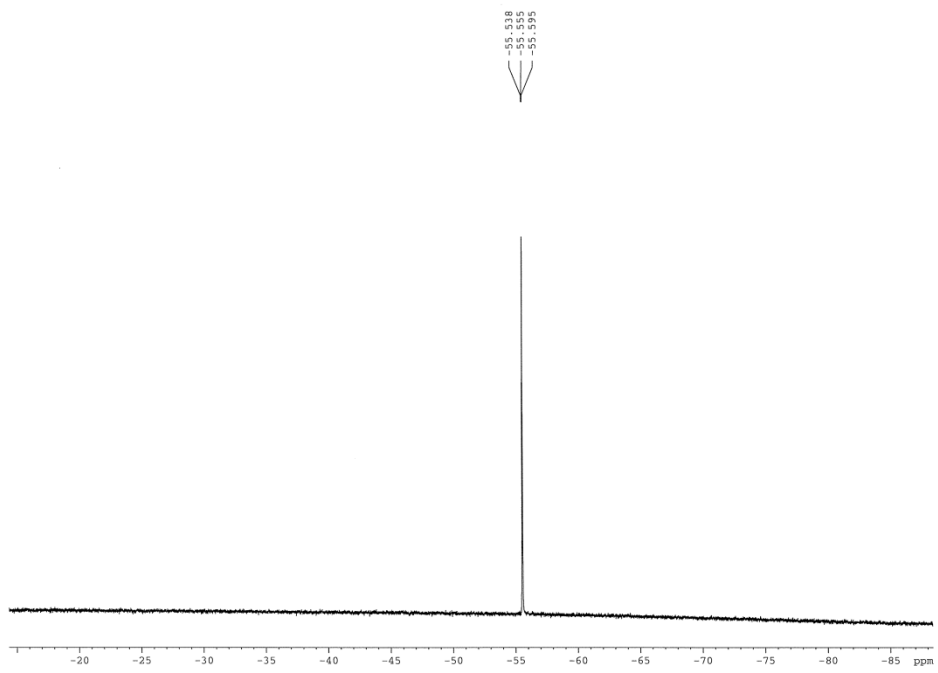



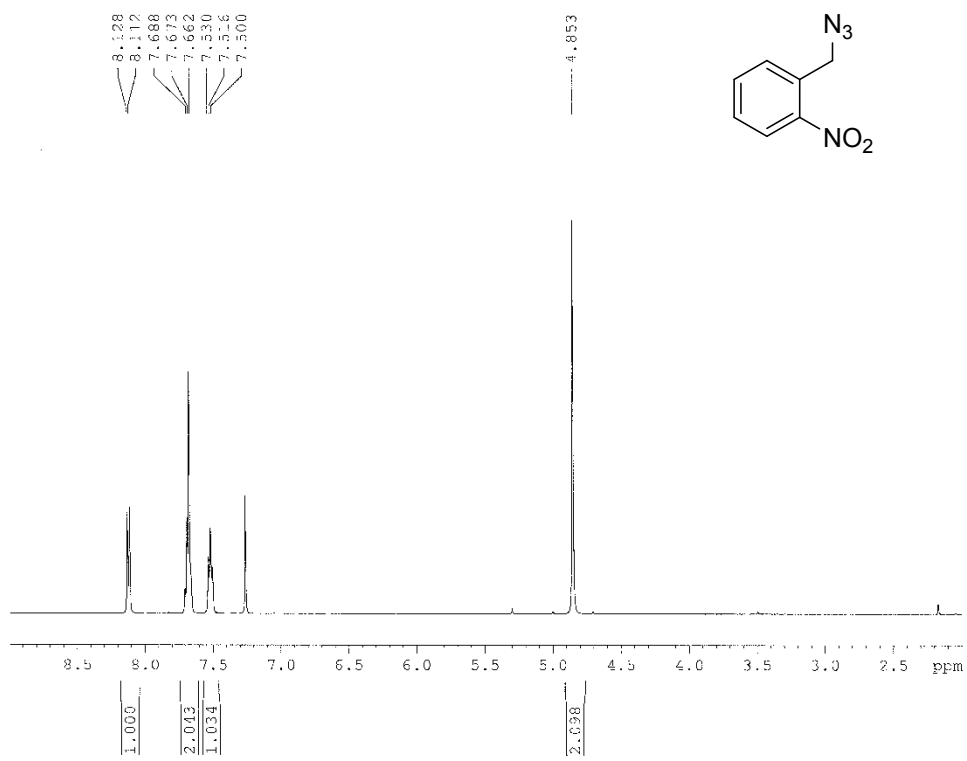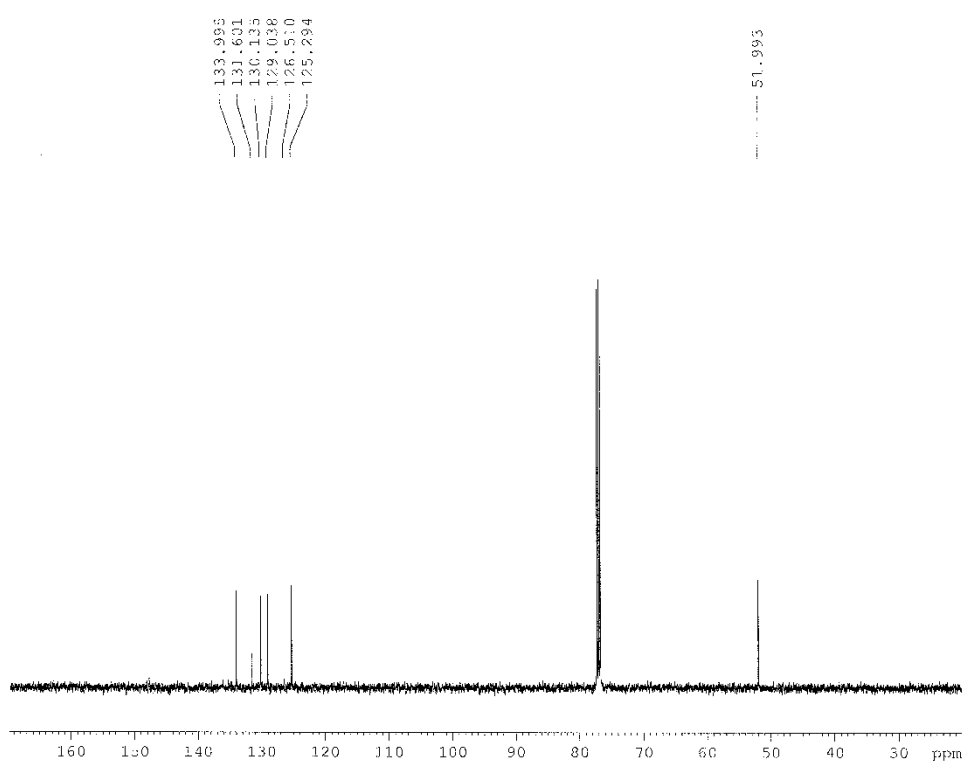

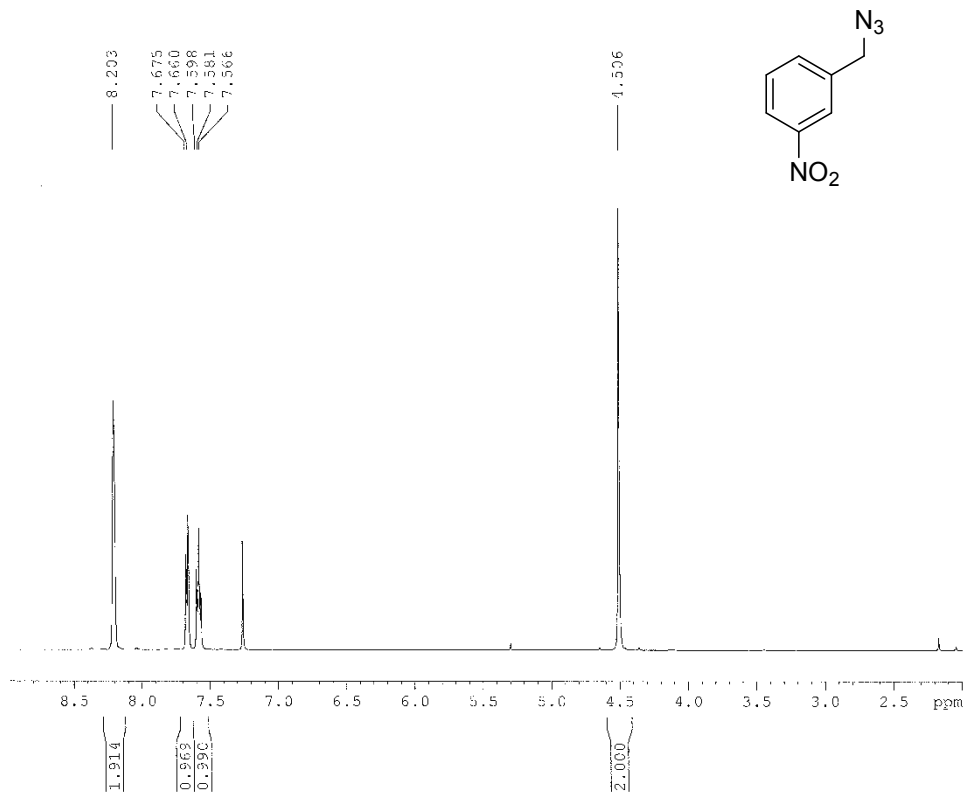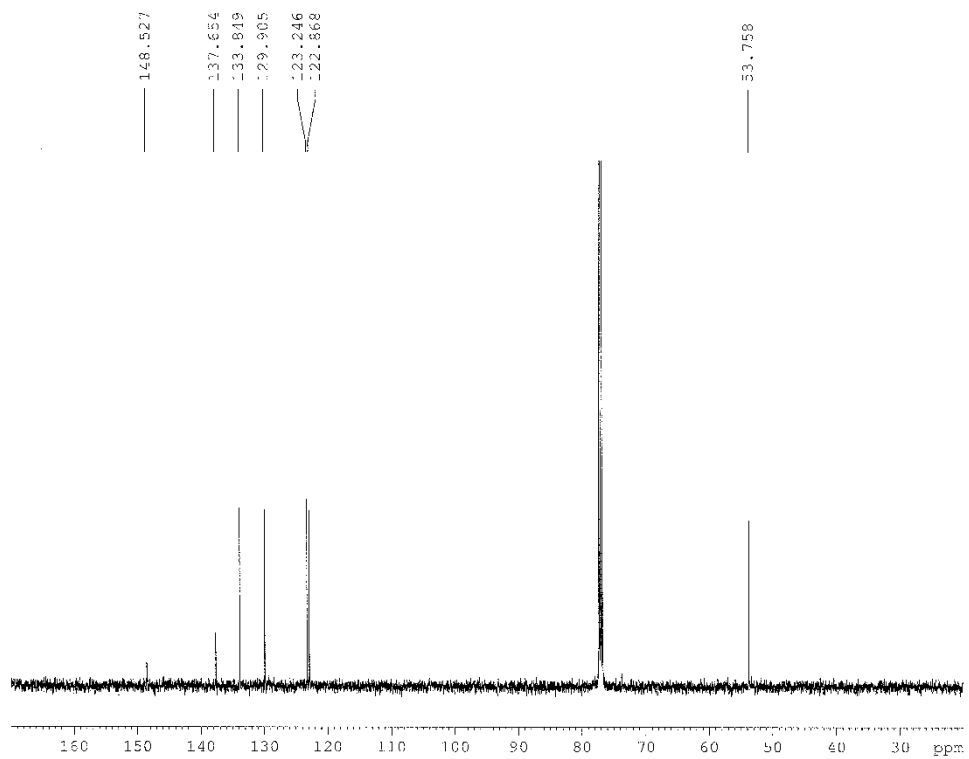

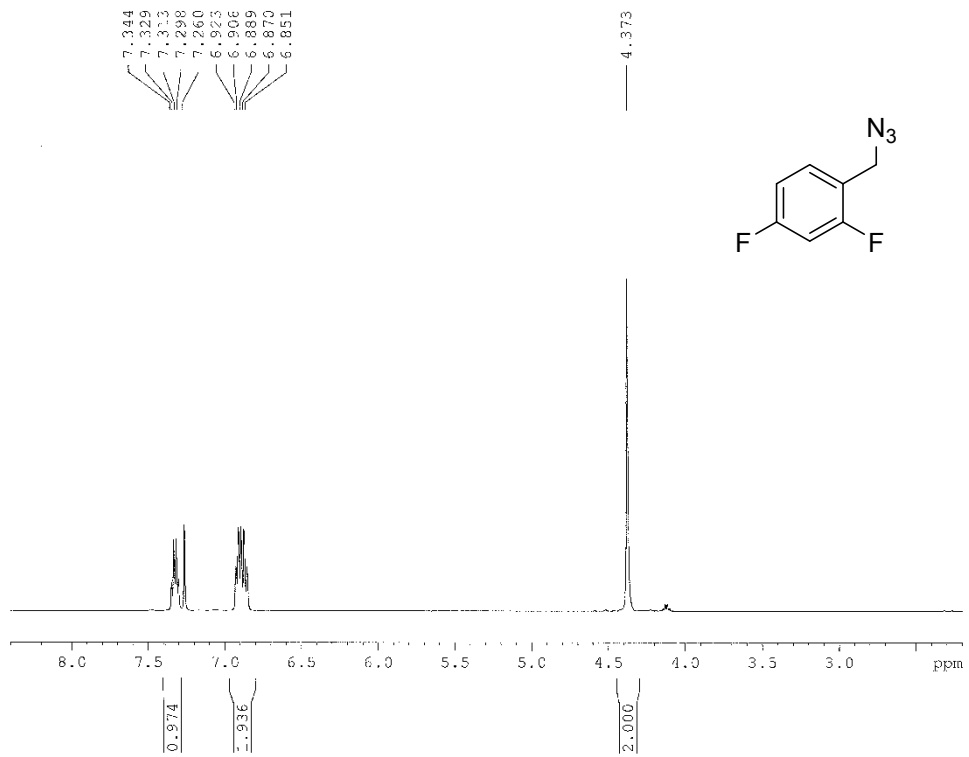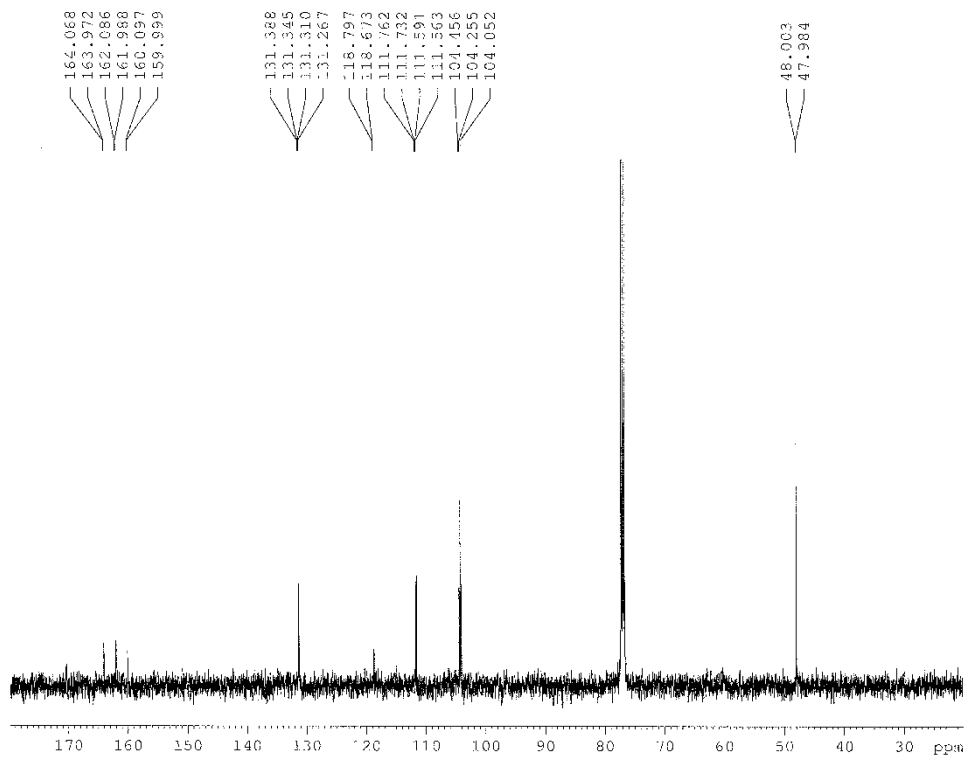

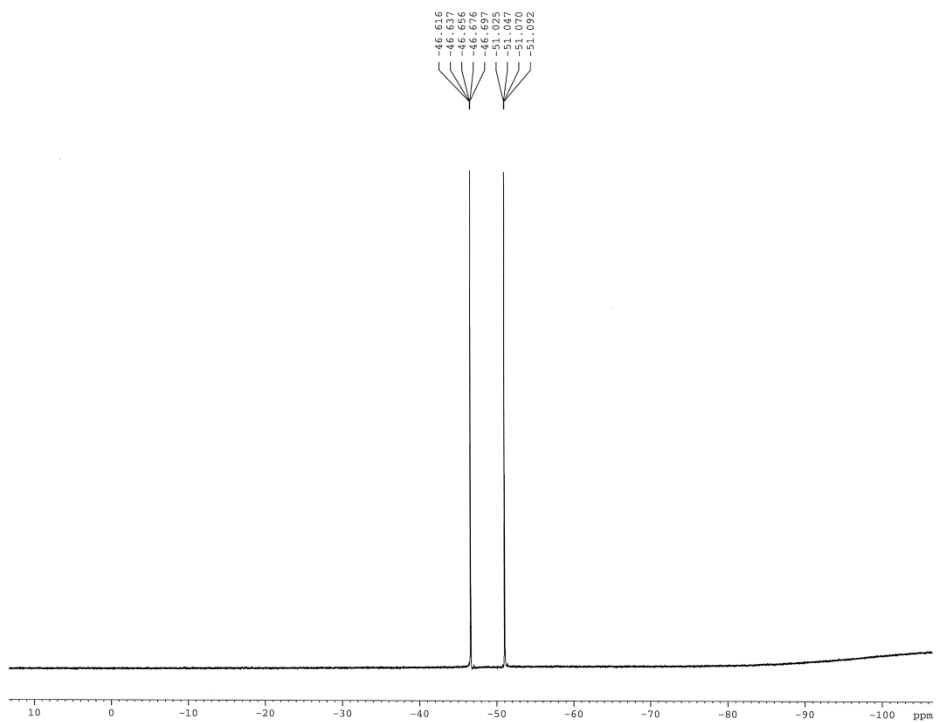

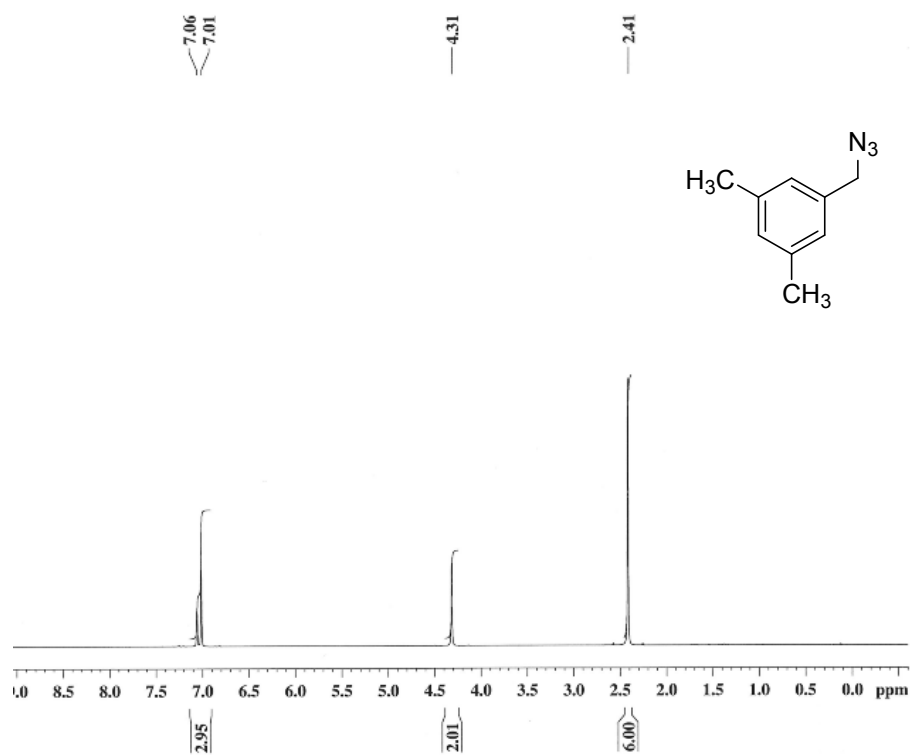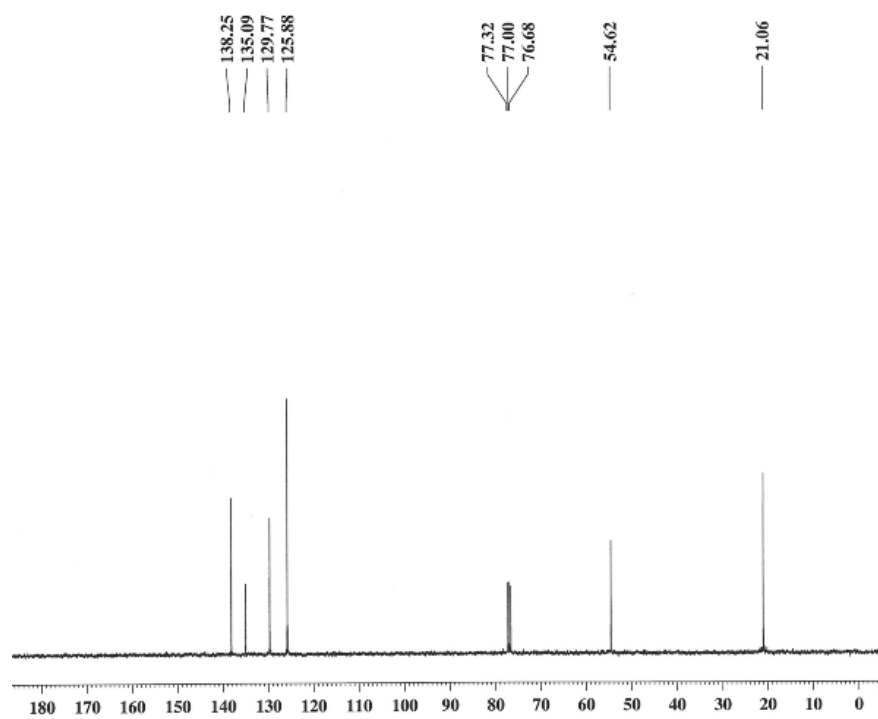

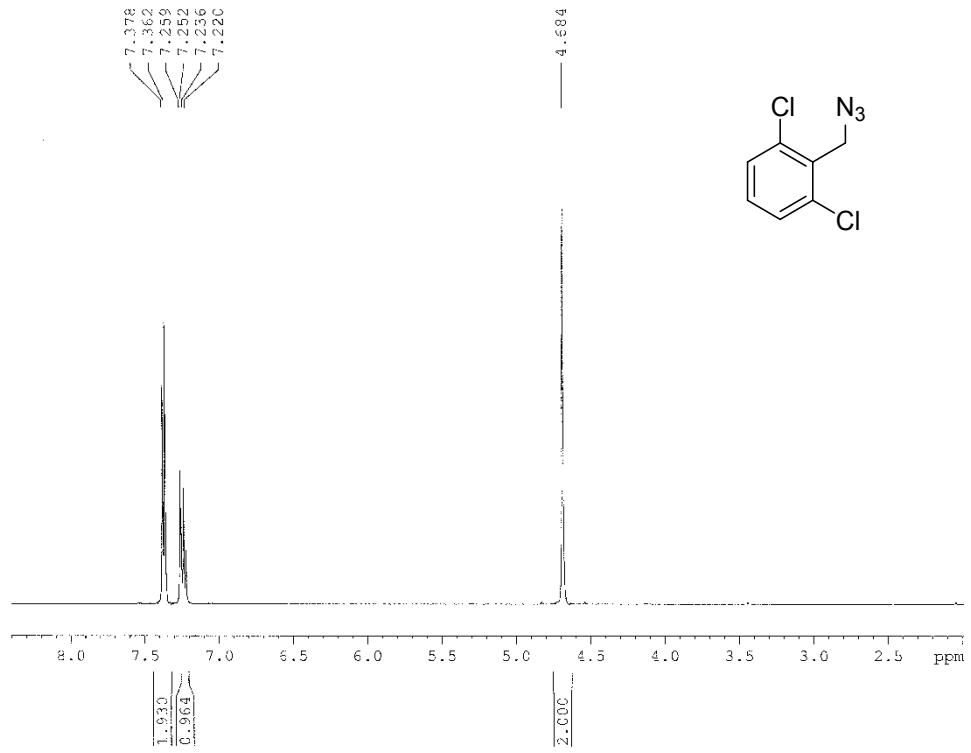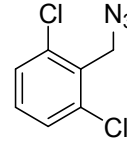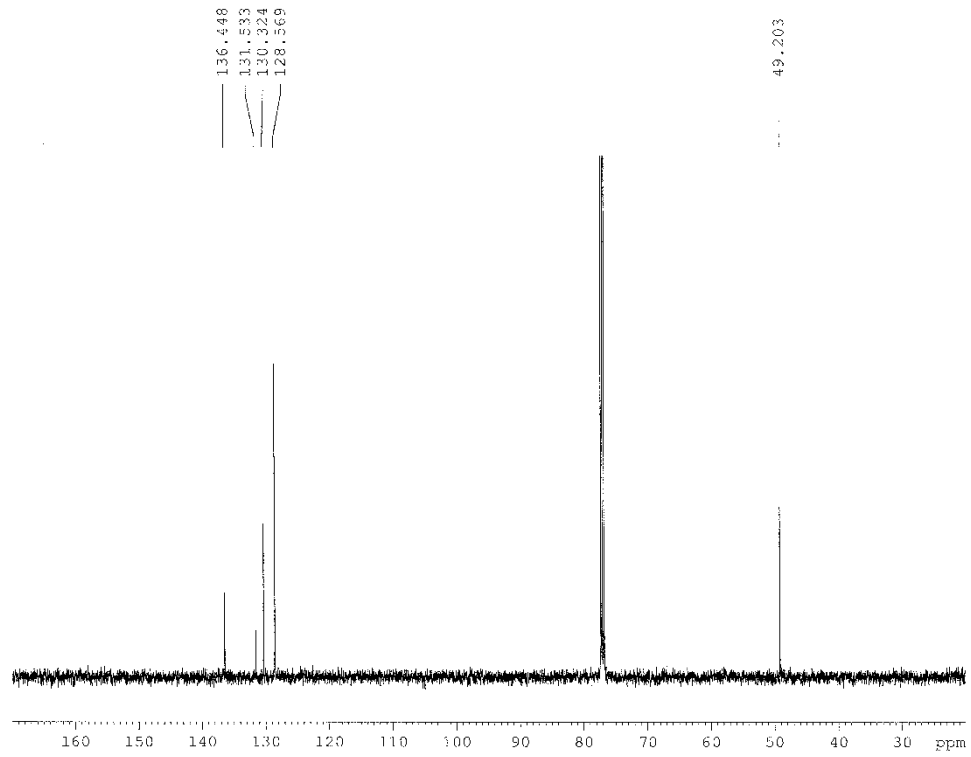

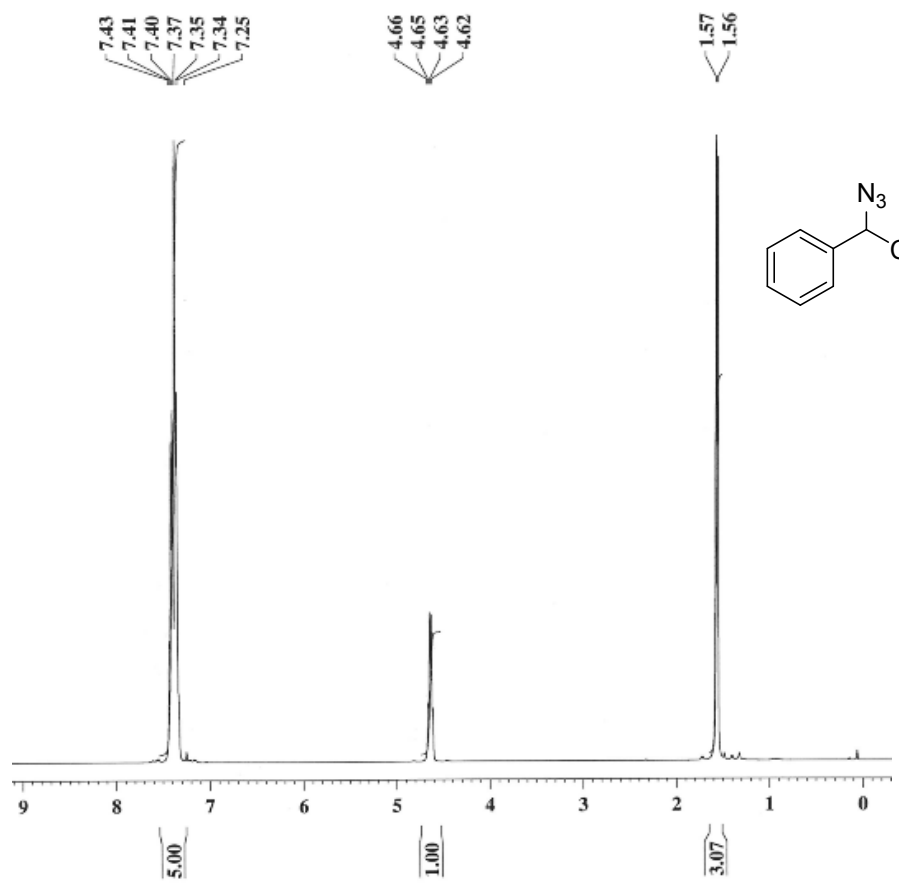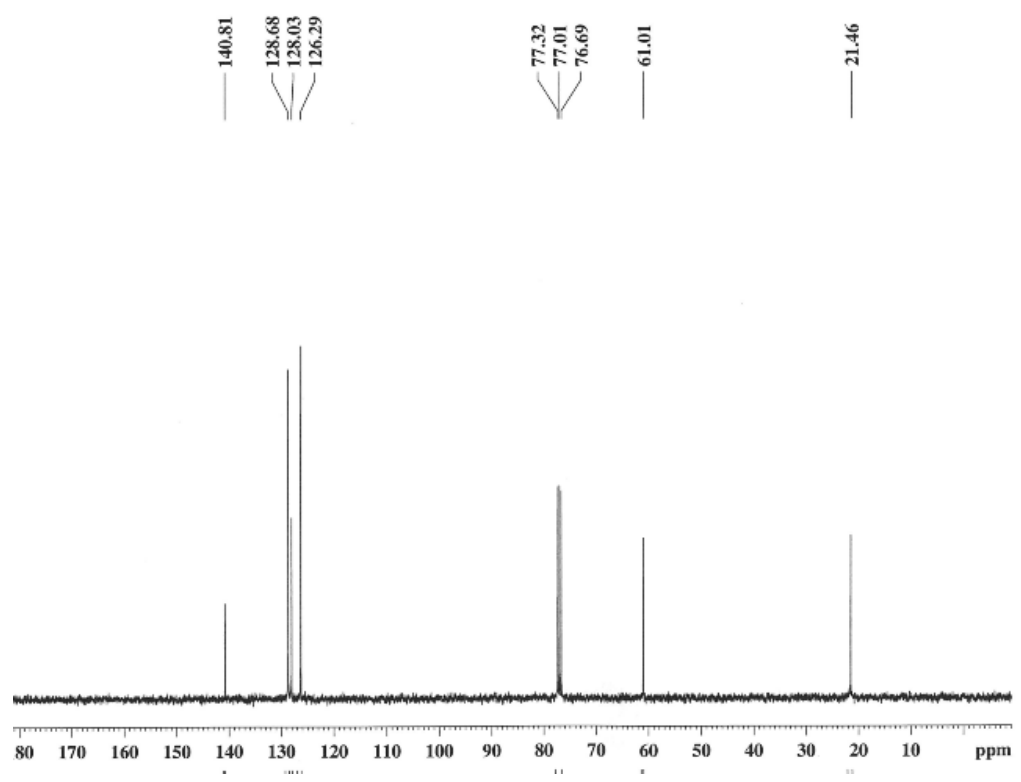

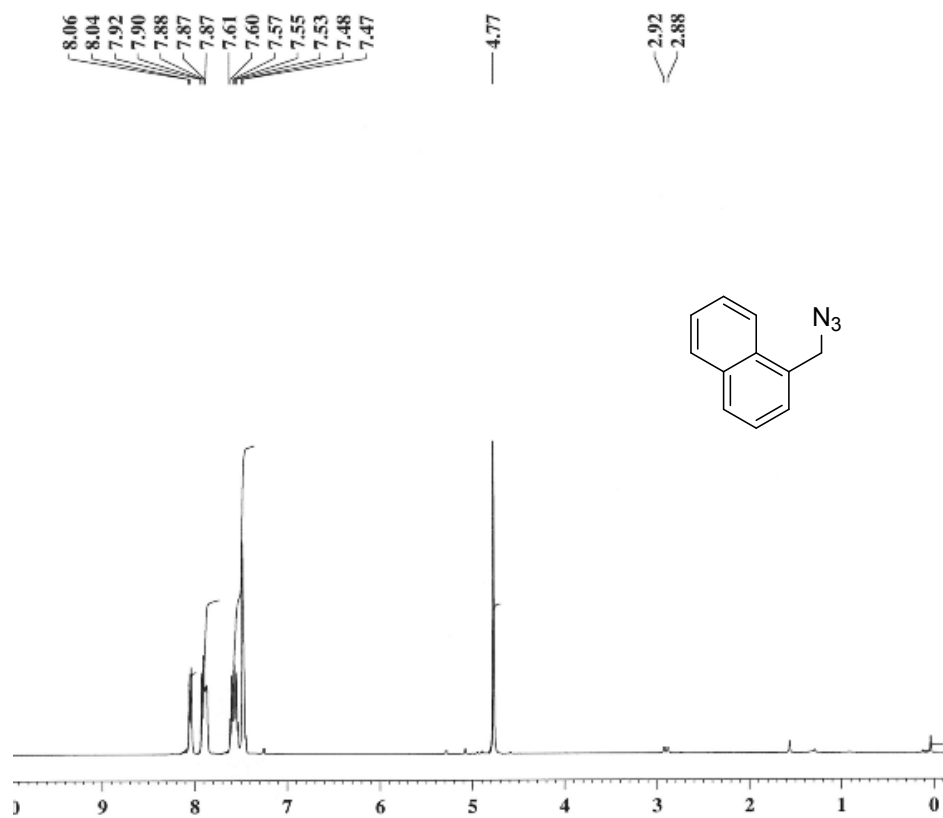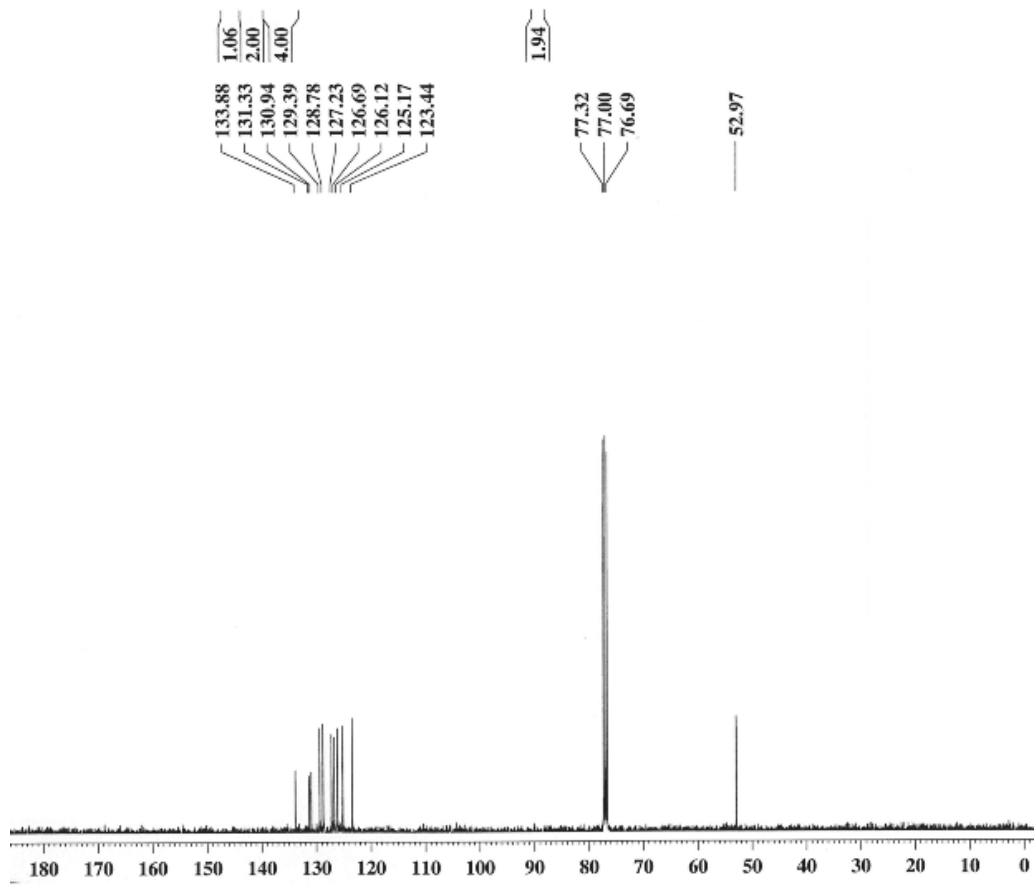



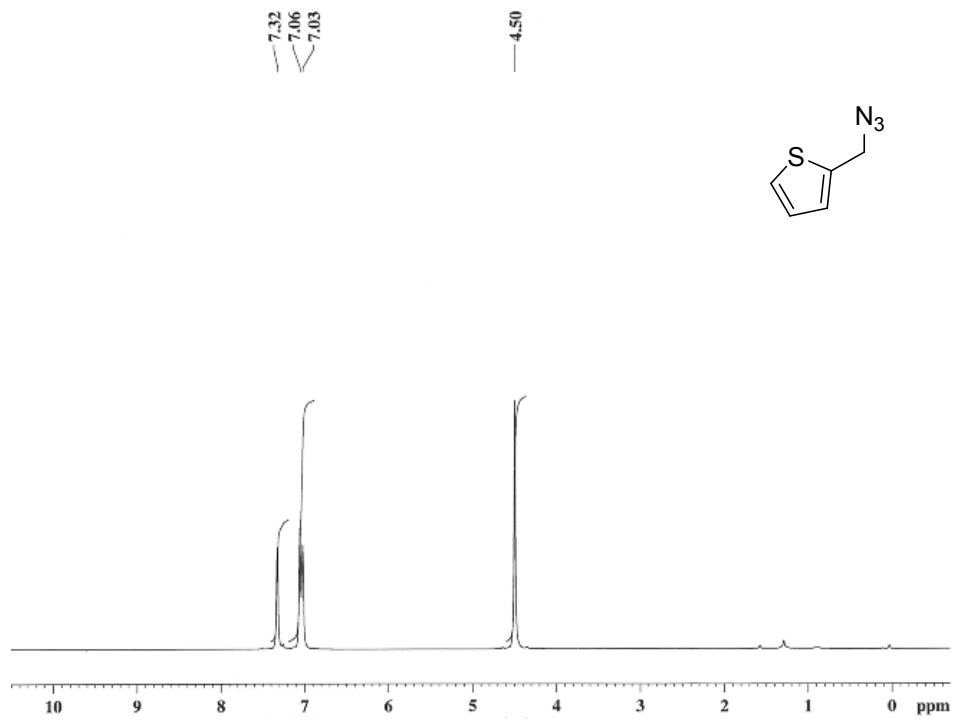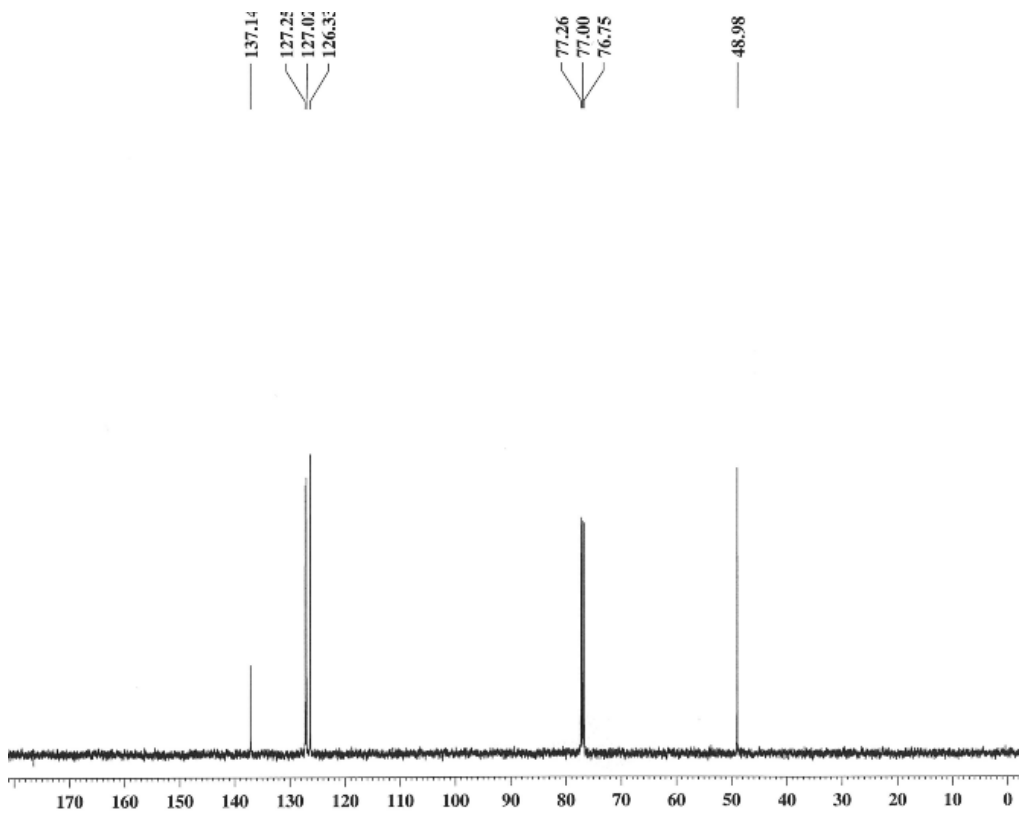

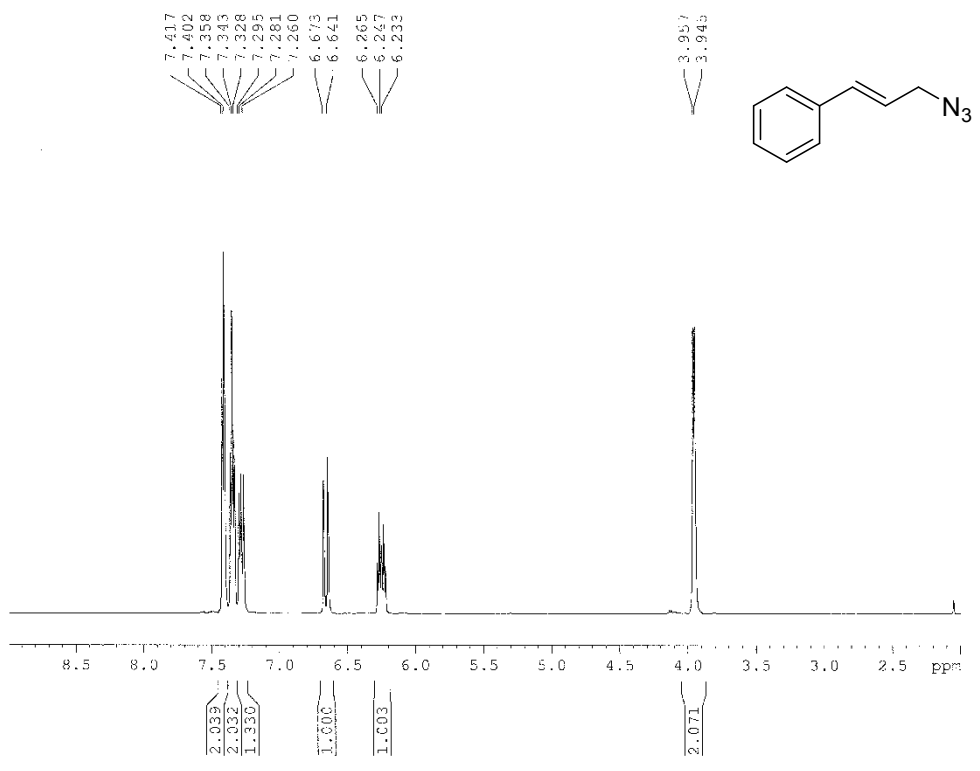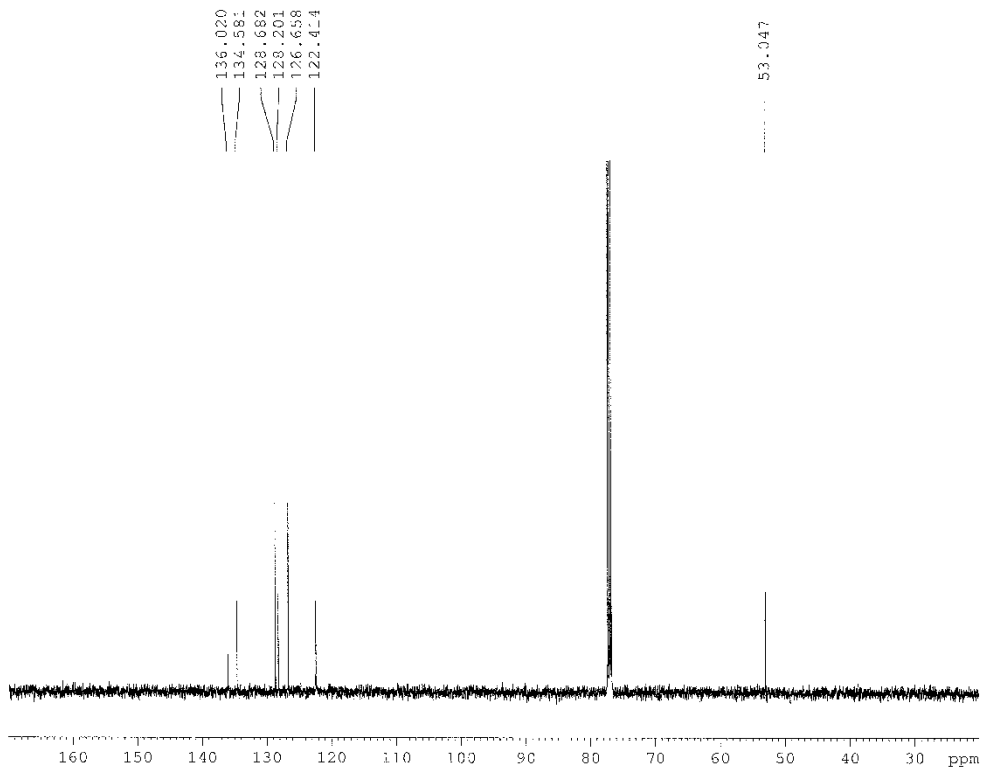

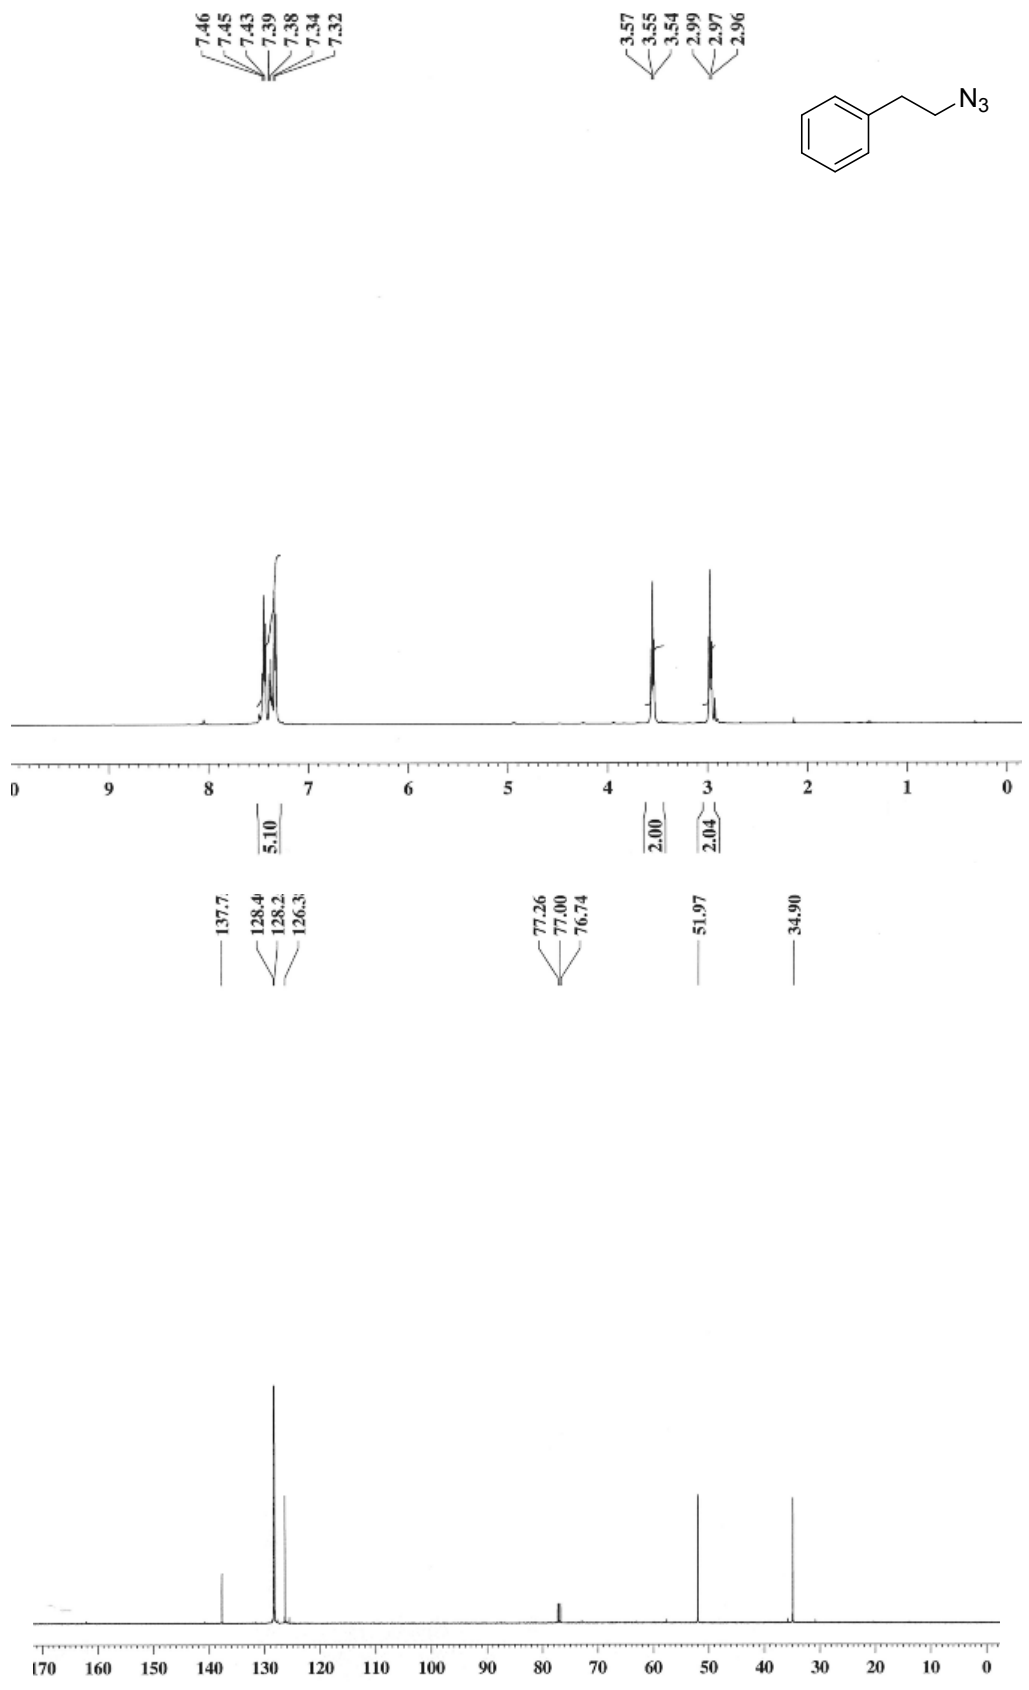

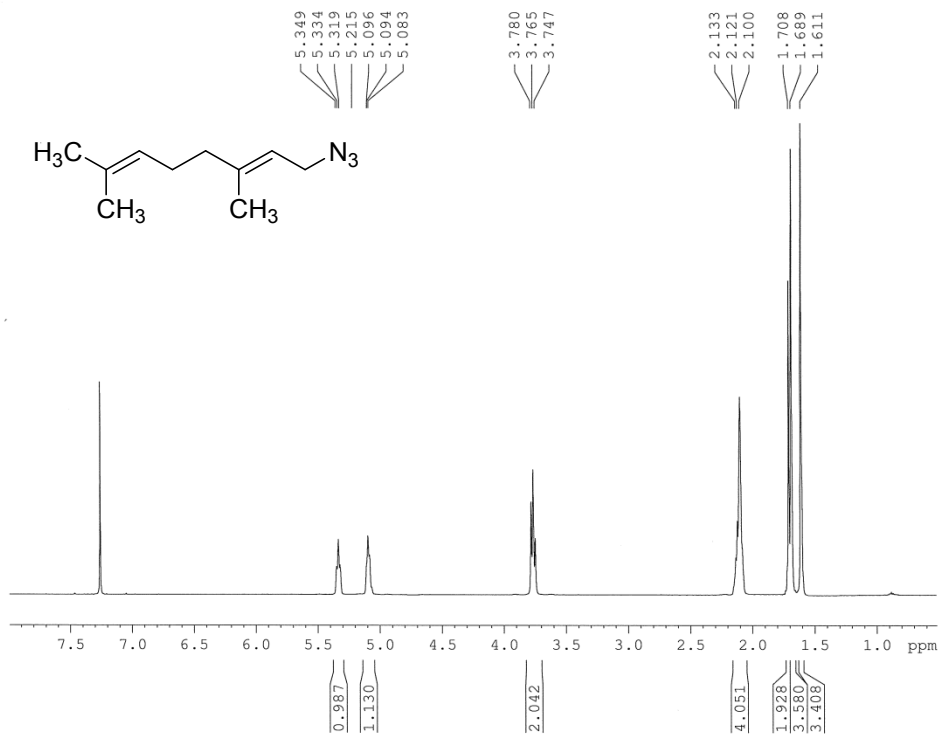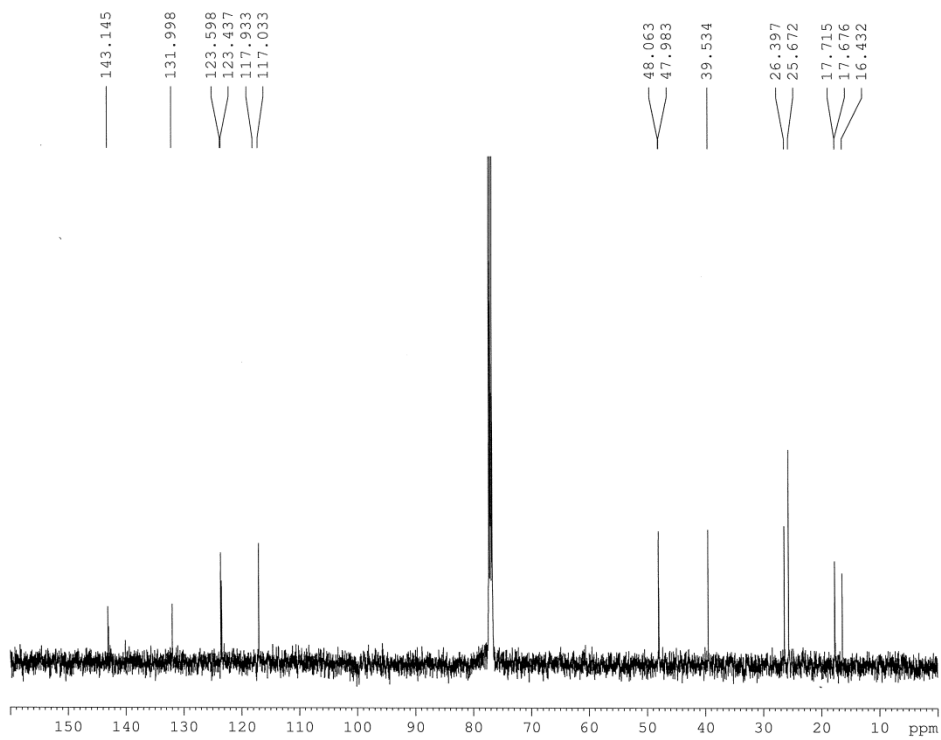

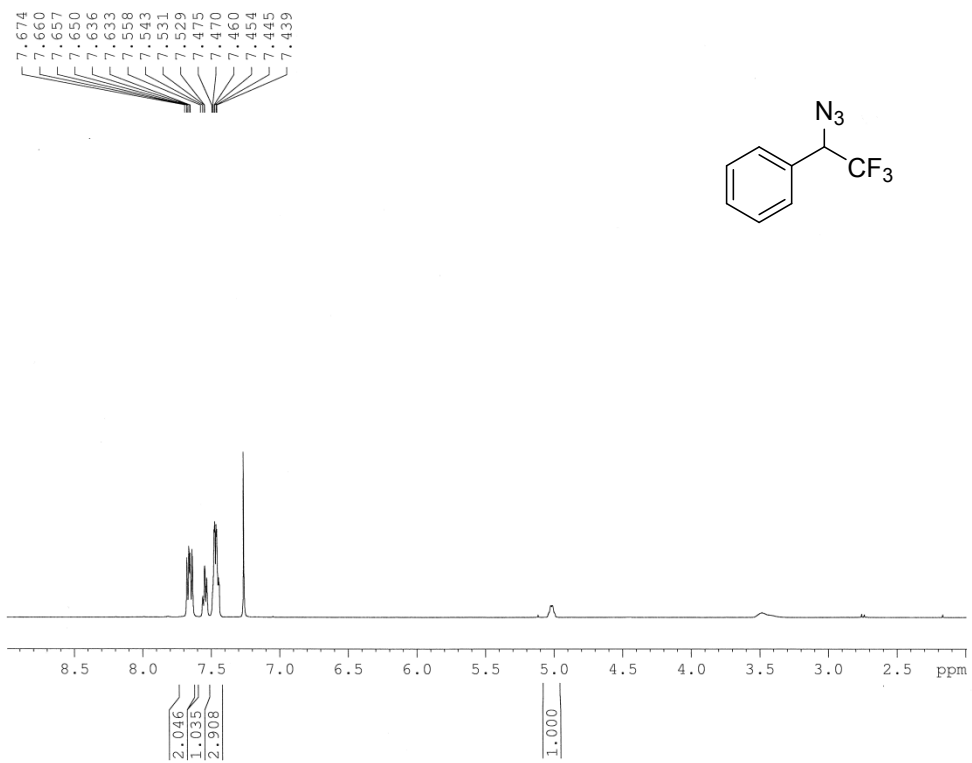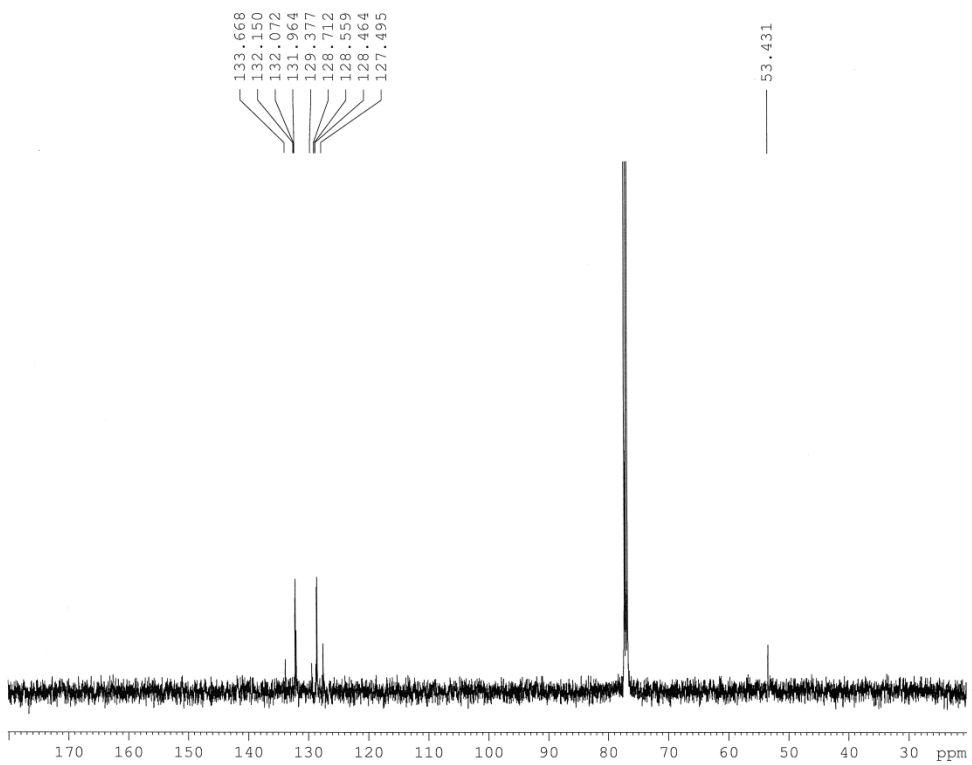

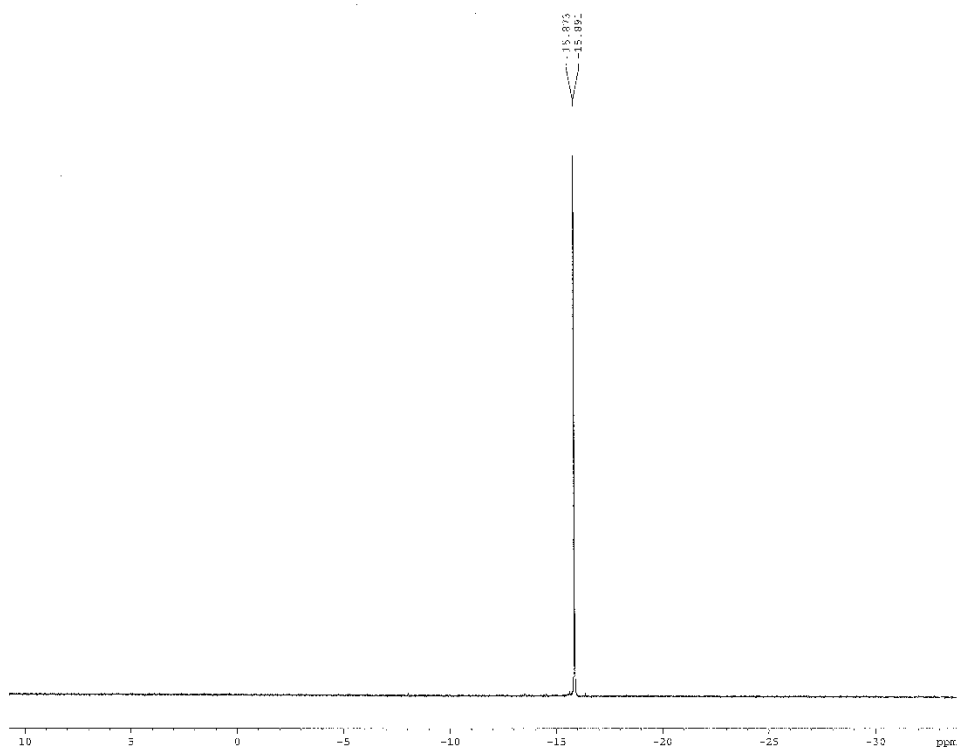

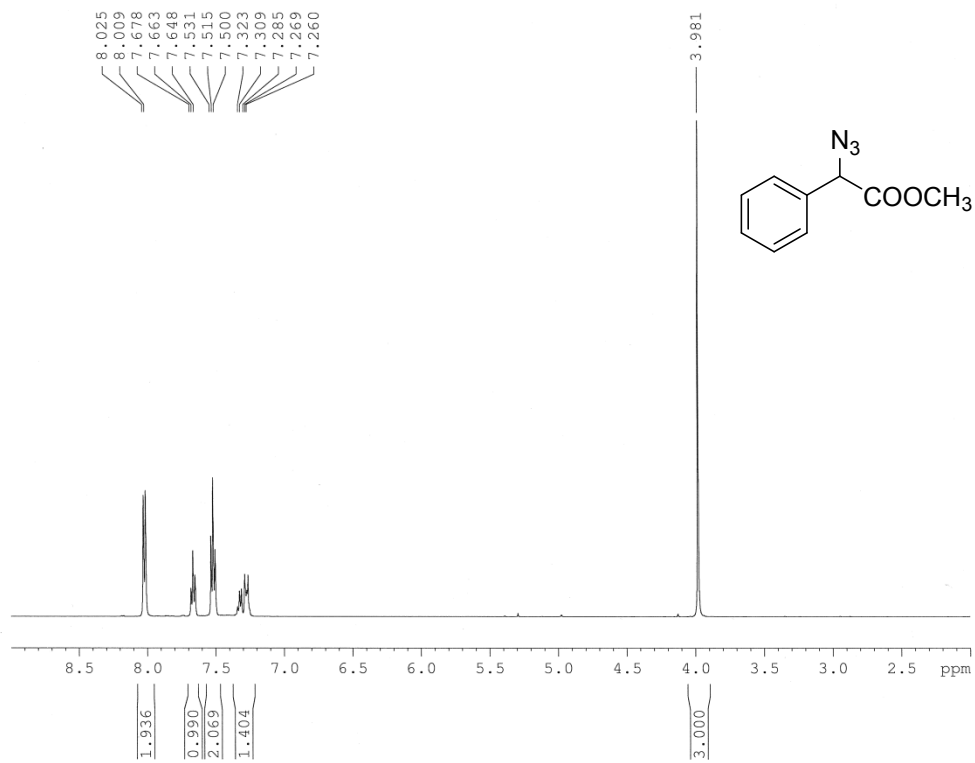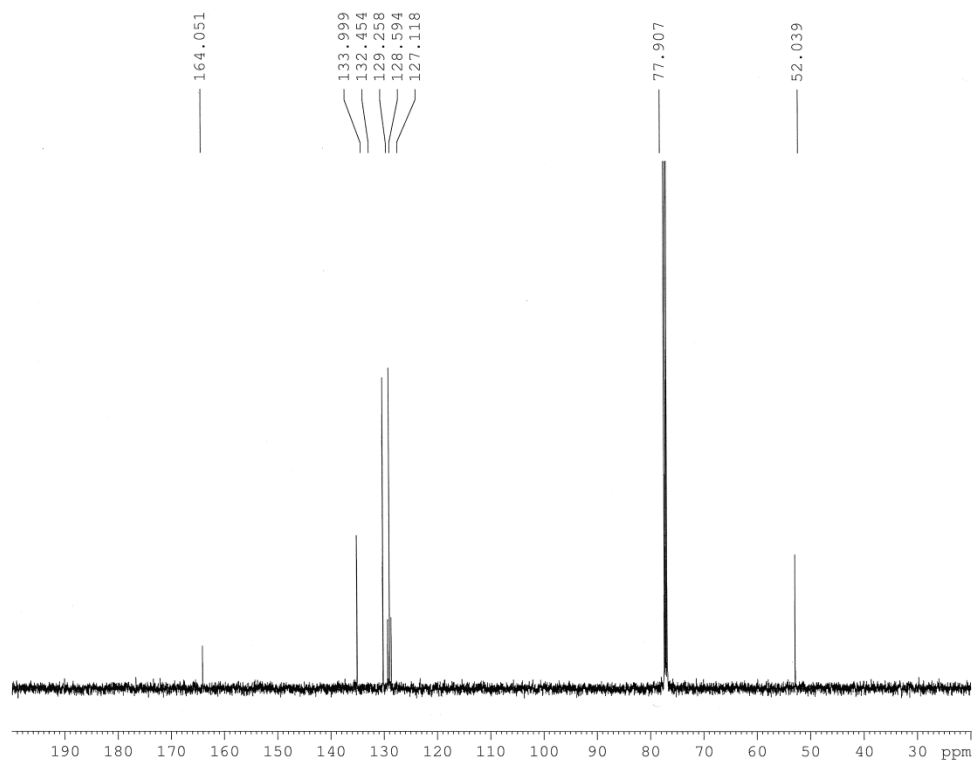

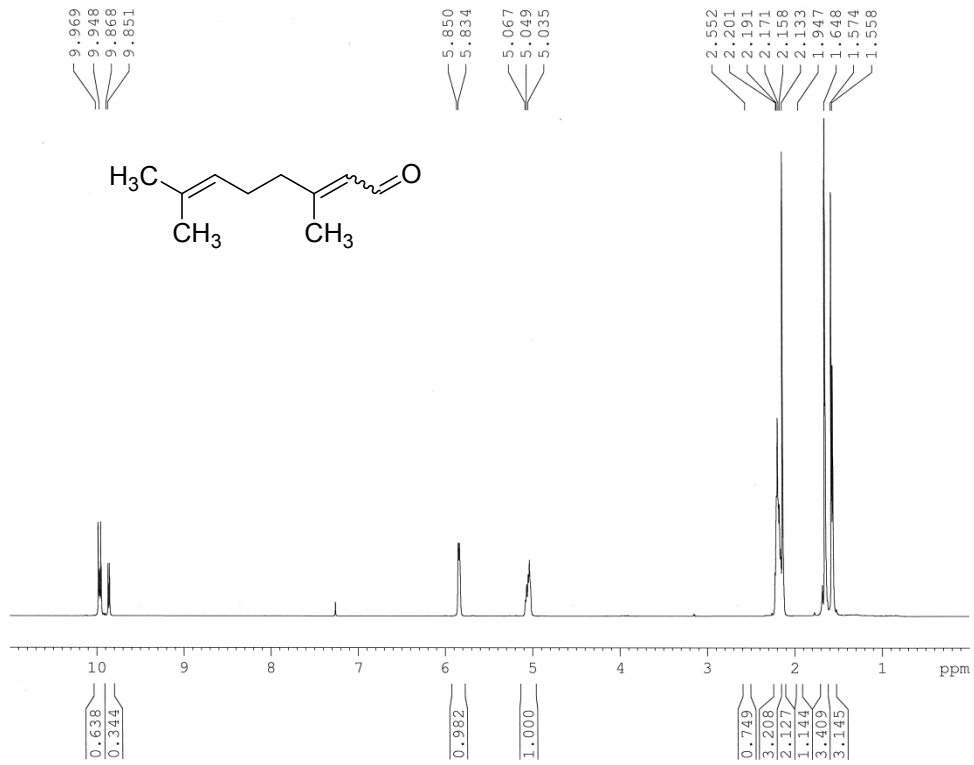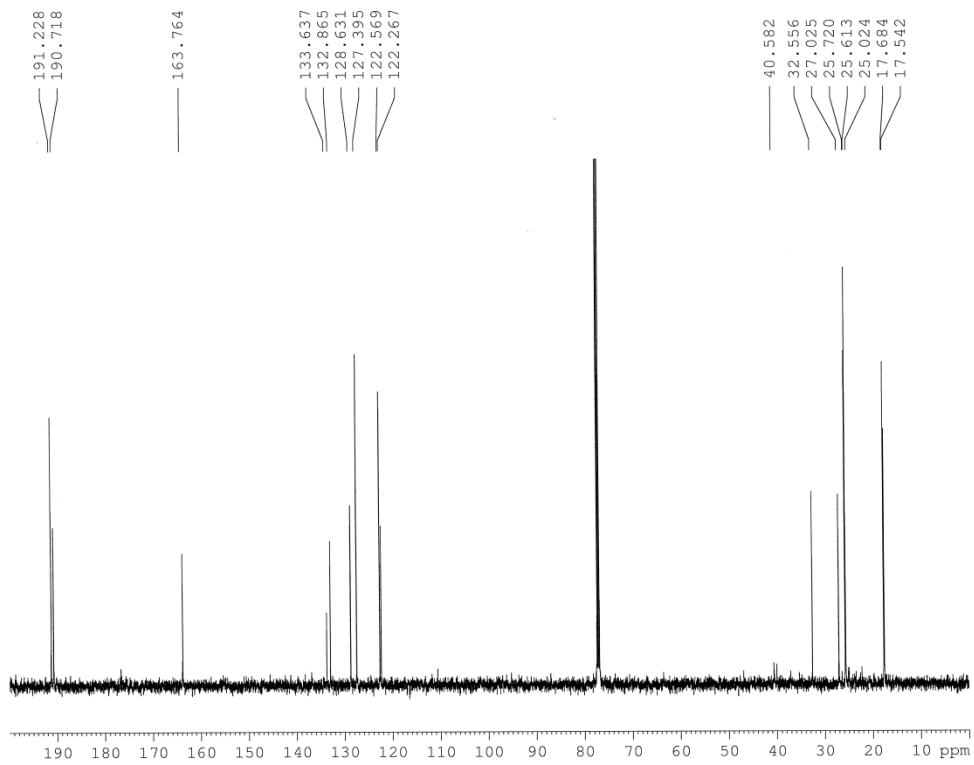



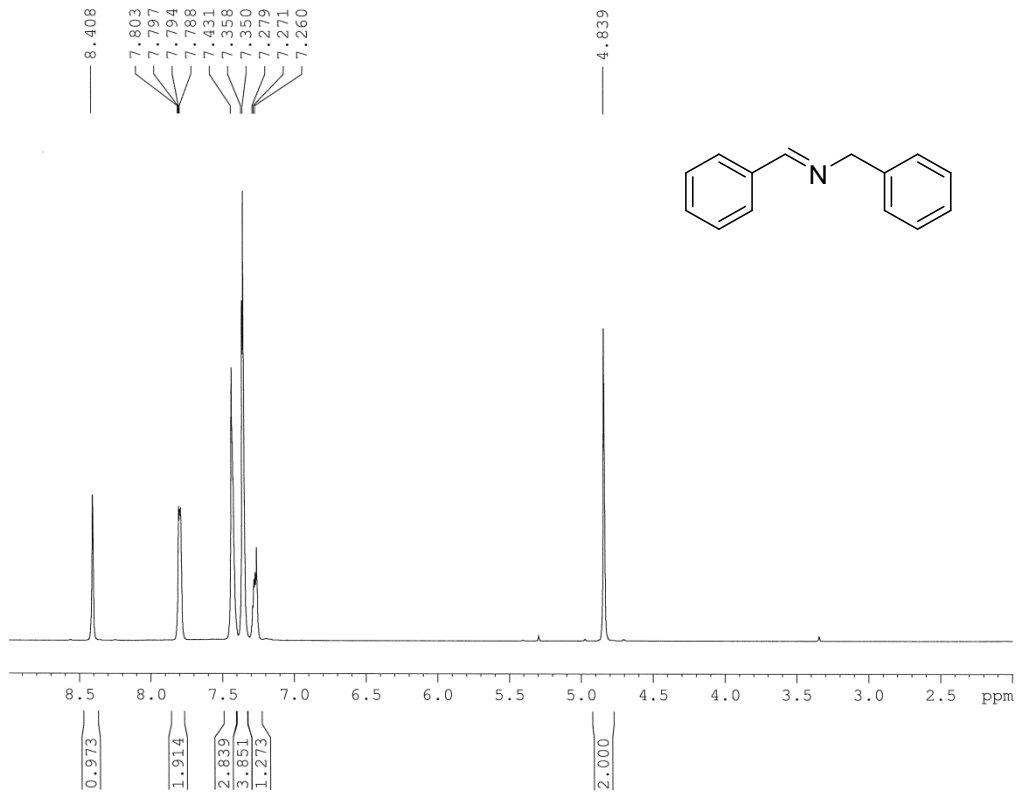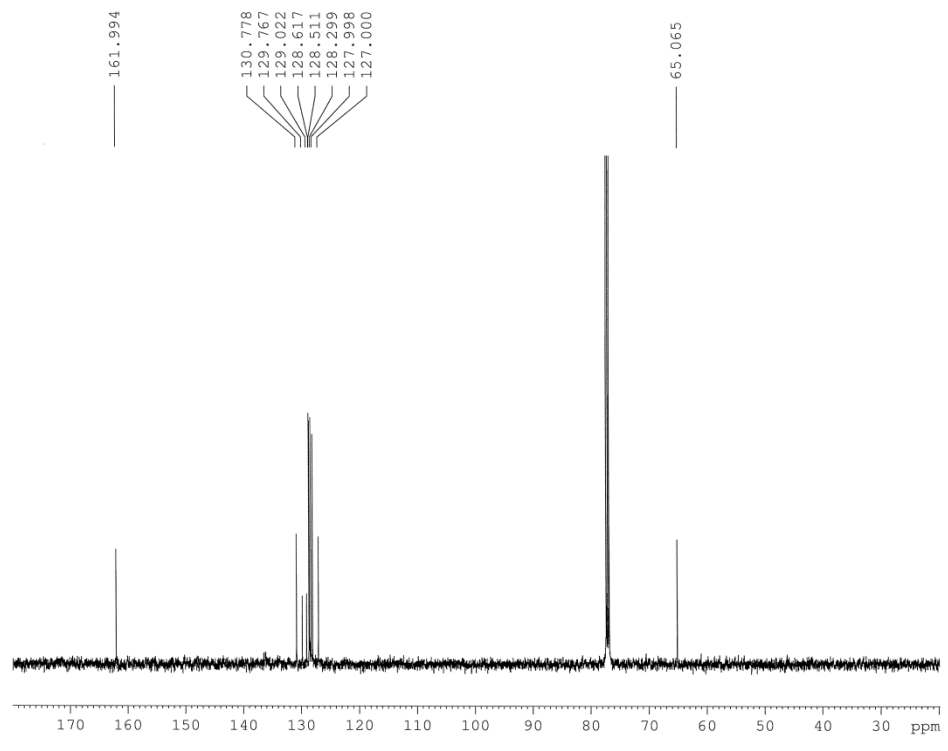

Supplement: SC-007-C5SC02857D-s001.pdf [file SC-007-C5SC02857D-s001.pdf]
